# Supplementary material for: Impact of Sedimentation on Water Seepage Capacity in Lake Nakuru, Kenya
Source: Hindawi journal article supplement (doi:10.1155/2021/8889189), 2021-02-16

## SUPPLEMENTARY FILES-4

### Supplementary Files for Article Entitled: “*Impact of Sedimentation on Water Seepage Capacity in Lake Nakuru*”

#### 4.1. Hydrometer Analysis of Sediment Sub-Sample Along the Core Depth

##### 4.1.1. Hydrometer Analysis of Sediment Sub-Sample Along the Core Depth (0 - 10)

| LABORATORY TEST DATA SHEET                         |                                                                                                                        |                                       |                                                 |                                    |                                       |                |        |
|----------------------------------------------------|------------------------------------------------------------------------------------------------------------------------|---------------------------------------|-------------------------------------------------|------------------------------------|---------------------------------------|----------------|--------|
| Hydrometer Analysis of the Soil Sediment           |                                                                                                                        |                                       |                                                 |                                    |                                       |                |        |
| Scope:                                             | Determination of the soil particle-size distribution for the fraction that is finer than No. 200 sieve size (0.075 mm) |                                       |                                                 |                                    |                                       |                |        |
| Description of soil: (sediment)                    |                                                                                                                        |                                       | Sample Location: P1                             |                                    |                                       |                |        |
| Location: Lake Nakuru (00°20'52'' S, 36°05'37'' E) |                                                                                                                        |                                       | Minuscus Correction Factor (F <sub>m</sub> )    | 1                                  |                                       |                |        |
| Sub-sample location on the core, (Cm)              | ≈0.0 - 10                                                                                                              |                                       | Temperature Correction (F <sub>T</sub> )        | -0.1                               |                                       |                |        |
| Dry weight of the soil, W <sub>s</sub> (g)         | 38.94                                                                                                                  |                                       | Zero Correction Factor (F <sub>Z</sub> )        | 7                                  |                                       |                |        |
| Temperature of test, T (°C)                        | 19                                                                                                                     |                                       | Specific gravity of soil solids, G <sub>s</sub> | 1.86                               |                                       |                |        |
| Tested by: Parfait IRADUKUNDA                      |                                                                                                                        |                                       | Correction for G <sub>s</sub> , a               | 1.346643<br>26                     |                                       |                |        |
| Supervised by:                                     |                                                                                                                        |                                       | Date: 24 July 2019                              |                                    |                                       |                |        |
| Sub-Sample No.1 (Test ID: 0 - 10)                  |                                                                                                                        |                                       |                                                 |                                    |                                       |                |        |
| Time (t) in Min                                    | Observed H. Reading, R                                                                                                 | Corrected H. Reading, R <sub>cp</sub> | Percentage Finer (%)                            | Corrected Reading, R <sub>cl</sub> | Effective Length, L <sup>+</sup> (Cm) | A <sup>+</sup> | D (Cm) |
| 0.25                                               | 35                                                                                                                     | 27.9                                  | 96.49                                           | 36                                 | 10.4                                  | 0.0187         | 0.1207 |
| 0.5                                                | 33                                                                                                                     | 25.9                                  | 89.57                                           | 34                                 | 10.7                                  | 0.0187         | 0.0866 |
| 1                                                  | 31.8                                                                                                                   | 24.7                                  | 85.42                                           | 32.8                               | 10.9                                  | 0.0187         | 0.0618 |
| 2                                                  | 31.8                                                                                                                   | 24.7                                  | 85.42                                           | 32.8                               | 10.9                                  | 0.0187         | 0.0437 |
| 4                                                  | 31.8                                                                                                                   | 24.7                                  | 85.42                                           | 32.8                               | 10.9                                  | 0.0187         | 0.0309 |
| 8                                                  | 31.8                                                                                                                   | 24.7                                  | 85.42                                           | 32.8                               | 10.9                                  | 0.0187         | 0.0218 |
| 15                                                 | 30                                                                                                                     | 22.9                                  | 79.19                                           | 31                                 | 11.1                                  | 0.0187         | 0.0161 |
| 30                                                 | 29.3                                                                                                                   | 22.2                                  | 76.77                                           | 30.3                               | 11.4                                  | 0.0187         | 0.0115 |
| 60                                                 | 28                                                                                                                     | 20.9                                  | 72.28                                           | 29                                 | 11.5                                  | 0.0187         | 0.0082 |
| 120                                                | 27                                                                                                                     | 19.9                                  | 68.82                                           | 28                                 | 11.7                                  | 0.0187         | 0.0058 |
| 240                                                | 26                                                                                                                     | 18.9                                  | 65.36                                           | 27                                 | 11.9                                  | 0.0187         | 0.0042 |
| 480                                                | 25.8                                                                                                                   | 18.7                                  | 64.67                                           | 26.8                               | 11.9                                  | 0.0187         | 0.0029 |
| 1440                                               | 18                                                                                                                     | 10.9                                  | 37.69                                           | 19                                 | 13.2                                  | 0.0187         | 0.0018 |
| 2880                                               | 13                                                                                                                     | 5.9                                   | 20.40                                           | 14                                 | 14                                    | 0.0187         | 0.0013 |

#### 4.1.2. Hydrometer Analysis of Sediment Sub-Sample Along the Core Depth (10 - 20)

| LABORATORY TEST DATA SHEET                       |                                                                                                                        |                                       |                      |                                    |                                                 |                |           |
|--------------------------------------------------|------------------------------------------------------------------------------------------------------------------------|---------------------------------------|----------------------|------------------------------------|-------------------------------------------------|----------------|-----------|
| Hydrometer Analysis of the Soil Sediment         |                                                                                                                        |                                       |                      |                                    |                                                 |                |           |
| Scope:                                           | Determination of the soil particle-size distribution for the fraction that is finer than No. 200 sieve size (0.075 mm) |                                       |                      |                                    |                                                 |                |           |
| Description of soil: (sediment)                  |                                                                                                                        |                                       |                      |                                    | Sample Location: P1                             |                |           |
| Location: Lake Nakuru (00°20'52” S, 36°05'37” E) |                                                                                                                        |                                       |                      |                                    | Minuscus Correction Factor (F <sub>m</sub> )    |                | 1         |
| Sub-sample location on the core, (Cm)            |                                                                                                                        | 10.0 - 20.0                           |                      |                                    | Temperature Correction (F <sub>T</sub> )        |                | -0.1      |
| Dry weight of the soil, W <sub>s</sub> (g)       |                                                                                                                        | 50.59                                 |                      |                                    | Zero Correction Factor (F <sub>Z</sub> )        |                | 7         |
| Temperature of test, T (°C)                      |                                                                                                                        | 19                                    |                      |                                    | Specific gravity of soil solids, G <sub>s</sub> |                | 1.64      |
| Tested by: Parfait IRADUKUNDA                    |                                                                                                                        |                                       |                      |                                    | Correction for G <sub>s</sub> , a               |                | 1.5955189 |
| Supervised by:                                   |                                                                                                                        |                                       |                      |                                    | Date : 24 July 2019                             |                |           |
| Sub-Sample No.2 (Test ID: 10 - 20)               |                                                                                                                        |                                       |                      |                                    |                                                 |                |           |
| Time (t) in Min                                  | Observed H. Reading, R                                                                                                 | Corrected H. Reading, R <sub>cp</sub> | Percentage Finer (%) | Corrected Reading, R <sub>cl</sub> | Effective Length, L <sup>+</sup> (Cm)           | A <sup>+</sup> | D (Cm)    |
| 0.25                                             | 36                                                                                                                     | 28.9                                  | 91.15                | 37                                 | 10.2                                            | 0.0217         | 0.1385    |
| 0.5                                              | 33                                                                                                                     | 25.9                                  | 81.68                | 34                                 | 10.7                                            | 0.0217         | 0.1003    |
| 1                                                | 32.2                                                                                                                   | 25.1                                  | 79.16                | 33.2                               | 10.9                                            | 0.0217         | 0.0716    |
| 2                                                | 30                                                                                                                     | 22.9                                  | 72.22                | 31                                 | 11.2                                            | 0.0217         | 0.0513    |
| 4                                                | 26                                                                                                                     | 18.9                                  | 59.61                | 27                                 | 11.9                                            | 0.0217         | 0.0374    |
| 8                                                | 25.4                                                                                                                   | 18.3                                  | 57.71                | 26.4                               | 11.9                                            | 0.0217         | 0.0265    |
| 15                                               | 25                                                                                                                     | 17.9                                  | 56.45                | 26                                 | 12                                              | 0.0217         | 0.0194    |
| 30                                               | 24.8                                                                                                                   | 17.7                                  | 55.82                | 25.8                               | 12.1                                            | 0.0217         | 0.0138    |
| 60                                               | 24                                                                                                                     | 16.9                                  | 53.30                | 25                                 | 12.2                                            | 0.0217         | 0.0098    |
| 120                                              | 22.6                                                                                                                   | 15.5                                  | 48.88                | 23.6                               | 12.4                                            | 0.0217         | 0.0070    |
| 240                                              | 20.8                                                                                                                   | 13.7                                  | 43.21                | 21.8                               | 12.7                                            | 0.0217         | 0.0050    |
| 480                                              | 18.4                                                                                                                   | 11.3                                  | 35.64                | 19.4                               | 13.1                                            | 0.0217         | 0.0036    |
| 1440                                             | 15.4                                                                                                                   | 8.3                                   | 26.18                | 16.4                               | 13.6                                            | 0.0217         | 0.0021    |
| 2880                                             | 12                                                                                                                     | 4.9                                   | 15.45                | 13                                 | 14.2                                            | 0.0217         | 0.0015    |

#### 4.1.3. Hydrometer Analysis of Sediment Sub-Sample Along the Core Depth (20 - 30)

| LABORATORY TEST DATA SHEET                              |                                                                                                                        |                                       |                      |                                    |                                                 |                |            |
|---------------------------------------------------------|------------------------------------------------------------------------------------------------------------------------|---------------------------------------|----------------------|------------------------------------|-------------------------------------------------|----------------|------------|
| Hydrometer Analysis of the Soil Sediment                |                                                                                                                        |                                       |                      |                                    |                                                 |                |            |
| <b>Scope:</b>                                           | Determination of the soil particle-size distribution for the fraction that is finer than No. 200 sieve size (0.075 mm) |                                       |                      |                                    |                                                 |                |            |
| <b>Description of soil:</b> ( <i>sediment</i> )         |                                                                                                                        |                                       |                      |                                    | <b>Sample Location:</b> P1                      |                |            |
| <b>Location:</b> Lake Nakuru (00°20'52" S, 36°05'37" E) |                                                                                                                        |                                       |                      |                                    | Minuscus Correction Factor (F <sub>m</sub> )    |                | 1          |
| Sub-sample location on the core, (Cm)                   |                                                                                                                        | 20.0 - 30.0                           |                      |                                    | Temperature Correction (F <sub>T</sub> )        |                | -0.1       |
| Dry weight of the soil, W <sub>s</sub> (g)              |                                                                                                                        | 38.09                                 |                      |                                    | Zero Correction Factor (F <sub>Z</sub> )        |                | 7          |
| Temperature of test, T (°C)                             |                                                                                                                        | 19                                    |                      |                                    | Specific gravity of soil solids, G <sub>s</sub> |                | 1.98       |
| <b>Tested by:</b> Parfait IRADUKUNDA                    |                                                                                                                        |                                       |                      |                                    | Correction for G <sub>s</sub> , a               |                | 1.25798999 |
| <b>Supervised by:</b>                                   |                                                                                                                        |                                       |                      |                                    | <b>Date:</b> 24 July 2019                       |                |            |
| <b>Sub-Sample No.3 (Test ID: 20 - 30)</b>               |                                                                                                                        |                                       |                      |                                    |                                                 |                |            |
| Time (t) in Min                                         | Observed H. Reading, R                                                                                                 | Corrected H. Reading, R <sub>cp</sub> | Percentage Finer (%) | Corrected Reading, R <sub>cl</sub> | Effective Length, L <sup>+</sup> (Cm)           | A <sup>+</sup> | D (Cm)     |
| 0.25                                                    | 24                                                                                                                     | 16.9                                  | 55.82                | 25                                 | 12.2                                            | 0.0175         | 0.1224     |
| 0.5                                                     | 22                                                                                                                     | 14.9                                  | 49.21                | 23                                 | 12.5                                            | 0.0175         | 0.0876     |
| 1                                                       | 19.8                                                                                                                   | 12.7                                  | 41.94                | 20.8                               | 12.9                                            | 0.0175         | 0.0630     |
| 2                                                       | 18                                                                                                                     | 10.9                                  | 36.00                | 19                                 | 13.2                                            | 0.0175         | 0.0450     |
| 4                                                       | 17.8                                                                                                                   | 10.7                                  | 35.34                | 18.8                               | 13.1                                            | 0.0175         | 0.0317     |
| 8                                                       | 17.6                                                                                                                   | 10.5                                  | 34.68                | 18.6                               | 13.1                                            | 0.0175         | 0.0224     |
| 15                                                      | 16.8                                                                                                                   | 9.7                                   | 32.04                | 17.8                               | 13.3                                            | 0.0175         | 0.0165     |
| 30                                                      | 16.8                                                                                                                   | 9.7                                   | 32.04                | 17.8                               | 13.4                                            | 0.0175         | 0.0117     |
| 60                                                      | 16.2                                                                                                                   | 9.1                                   | 30.05                | 17.2                               | 13.5                                            | 0.0175         | 0.0083     |
| 120                                                     | 15.2                                                                                                                   | 8.1                                   | 26.75                | 16.2                               | 13.7                                            | 0.0175         | 0.0059     |
| 240                                                     | 13.4                                                                                                                   | 6.3                                   | 20.81                | 14.4                               | 13.9                                            | 0.0175         | 0.0042     |
| 480                                                     | 12.4                                                                                                                   | 5.3                                   | 17.50                | 13.4                               | 14.1                                            | 0.0175         | 0.0030     |
| 1440                                                    | 11                                                                                                                     | 3.9                                   | 12.88                | 12                                 | 14.3                                            | 0.0175         | 0.0017     |
| 2880                                                    | 9                                                                                                                      | 1.9                                   | 6.28                 | 10                                 | 14.7                                            | 0.0175         | 0.0013     |

#### 4.1.4. Hydrometer Analysis of Sediment Sub-Sample Along the Core Depth (30 - 40)

| LABORATORY TEST DATA SHEET                       |                                                                                                                        |                           |                      |                        |                                              |                |        |
|--------------------------------------------------|------------------------------------------------------------------------------------------------------------------------|---------------------------|----------------------|------------------------|----------------------------------------------|----------------|--------|
| Hydrometer Analysis of the Soil Sediment         |                                                                                                                        |                           |                      |                        |                                              |                |        |
| Scope:                                           | Determination of the soil particle-size distribution for the fraction that is finer than No. 200 sieve size (0.075 mm) |                           |                      |                        |                                              |                |        |
| Description of soil: (sediment)                  |                                                                                                                        |                           |                      |                        | Sample Location: P1                          |                |        |
| Location: Lake Nakuru (00°20'52” S, 36°05'37” E) |                                                                                                                        |                           |                      |                        | Minuscus Correction Factor (F <sub>m</sub> ) | 1              |        |
| Sub-sample location on the core, (Cm)            |                                                                                                                        | 30.0 - 40.0               |                      |                        | Temperature Correction (F <sub>T</sub> )     | -0.1           |        |
| Dry weight of the soil, Ws (g)                   |                                                                                                                        | 34.98                     |                      |                        | Zero Correction Factor (F <sub>Z</sub> )     | 7              |        |
| Temperature of test, T (°C)                      |                                                                                                                        | 19                        |                      |                        | Specific gravity of soil solids, Gs          | 2.03           |        |
| Tested by: Parfait IRADUKUNDA                    |                                                                                                                        |                           |                      |                        | Correction for Gs, a                         | 1.2271478      |        |
| Supervised by:                                   |                                                                                                                        |                           |                      |                        | Date: 24 July 2019                           |                |        |
| Sub-Sample No.4 (Test ID: 30 - 40)               |                                                                                                                        |                           |                      |                        |                                              |                |        |
| Time (t) in Min                                  | Observed H. Reading, R                                                                                                 | Corrected H. Reading, Rcp | Percentage Finer (%) | Corrected Reading, Rcl | Effective Length, L <sup>+</sup> (Cm)        | A <sup>+</sup> | D (Cm) |
| 0.25                                             | 27                                                                                                                     | 19.9                      | 69.81                | 28                     | 11.7                                         | 0.0171         | 0.1170 |
| 0.5                                              | 25.6                                                                                                                   | 18.5                      | 64.90                | 26.6                   | 11.9                                         | 0.0171         | 0.0834 |
| 1                                                | 24.4                                                                                                                   | 17.3                      | 60.69                | 25.4                   | 12.1                                         | 0.0171         | 0.0595 |
| 2                                                | 23.8                                                                                                                   | 16.7                      | 58.59                | 24.8                   | 12.2                                         | 0.0171         | 0.0422 |
| 4                                                | 23.4                                                                                                                   | 16.3                      | 57.18                | 24.4                   | 12.3                                         | 0.0171         | 0.0300 |
| 8                                                | 23                                                                                                                     | 15.9                      | 55.78                | 24                     | 12.4                                         | 0.0171         | 0.0213 |
| 15                                               | 22.2                                                                                                                   | 15.1                      | 52.97                | 23.2                   | 12.5                                         | 0.0171         | 0.0156 |
| 30                                               | 21.4                                                                                                                   | 14.3                      | 50.17                | 22.4                   | 12.6                                         | 0.0171         | 0.0111 |
| 60                                               | 20.8                                                                                                                   | 13.7                      | 48.06                | 21.8                   | 12.7                                         | 0.0171         | 0.0079 |
| 120                                              | 19.2                                                                                                                   | 12.1                      | 42.45                | 20.2                   | 13                                           | 0.0171         | 0.0056 |
| 240                                              | 17.8                                                                                                                   | 10.7                      | 37.54                | 18.8                   | 13.2                                         | 0.0171         | 0.0040 |
| 480                                              | 16.2                                                                                                                   | 9.1                       | 31.92                | 17.2                   | 13.5                                         | 0.0171         | 0.0029 |
| 1440                                             | 15                                                                                                                     | 7.9                       | 27.71                | 16                     | 13.7                                         | 0.0171         | 0.0017 |
| 2880                                             | 13                                                                                                                     | 5.9                       | 20.70                | 14                     | 14.2                                         | 0.0171         | 0.0012 |

#### 4.1.5. Hydrometer Analysis of Sediment Sub-Sample Along the Core Depth (40 - 50)

| LABORATORY TEST DATA SHEET                       |                                                                                                                        |                                       |                      |                                    |                                                 |                |        |
|--------------------------------------------------|------------------------------------------------------------------------------------------------------------------------|---------------------------------------|----------------------|------------------------------------|-------------------------------------------------|----------------|--------|
| Hydrometer Analysis of the Soil Sediment         |                                                                                                                        |                                       |                      |                                    |                                                 |                |        |
| Scope:                                           | Determination of the soil particle-size distribution for the fraction that is finer than No. 200 sieve size (0.075 mm) |                                       |                      |                                    |                                                 |                |        |
| Description of soil: (sediment)                  |                                                                                                                        |                                       |                      |                                    | Sample Location: P1                             |                |        |
| Location: Lake Nakuru (00°20'52” S, 36°05'37” E) |                                                                                                                        |                                       |                      |                                    | Minuscus Correction Factor (F <sub>m</sub> )    | 1              |        |
| Sub-sample location on the core, (Cm)            |                                                                                                                        | 40.0 - 50.0                           |                      |                                    | Temperature Correction (F <sub>T</sub> )        | -0.1           |        |
| Dry weight of the soil, W <sub>s</sub> (g)       |                                                                                                                        | 50                                    |                      |                                    | Zero Correction Factor (F <sub>Z</sub> )        | 7              |        |
| Temperature of test, T (°C)                      |                                                                                                                        | 19                                    |                      |                                    | Specific gravity of soil solids, G <sub>s</sub> | 1.97           |        |
| Tested by: Parfait IRADUKUNDA                    |                                                                                                                        |                                       |                      |                                    | Correction for G <sub>s</sub> , a               | 1.26454        |        |
| Supervised by:                                   |                                                                                                                        |                                       |                      |                                    | Date: 24 July 2019                              |                |        |
| Sub-Sample No.5 (Test ID: 40 - 50)               |                                                                                                                        |                                       |                      |                                    |                                                 |                |        |
| Time (t) in Min                                  | Observed H. Reading, R                                                                                                 | Corrected H. Reading, R <sub>cp</sub> | Percentage Finer (%) | Corrected Reading, R <sub>cl</sub> | Effective Length, L <sup>+</sup> (Cm)           | A <sup>+</sup> | D (Cm) |
| 0.25                                             | 37                                                                                                                     | 29.9                                  | 75.62                | 38                                 | 10.1                                            | 0.0176         | 0.1120 |
| 0.5                                              | 35                                                                                                                     | 27.9                                  | 70.56                | 36                                 | 10.4                                            | 0.0176         | 0.0803 |
| 1                                                | 33.8                                                                                                                   | 26.7                                  | 67.53                | 34.8                               | 10.6                                            | 0.0176         | 0.0574 |
| 2                                                | 32.6                                                                                                                   | 25.5                                  | 64.49                | 33.6                               | 10.8                                            | 0.0176         | 0.0409 |
| 4                                                | 32.4                                                                                                                   | 25.3                                  | 63.99                | 33.4                               | 10.8                                            | 0.0176         | 0.0289 |
| 8                                                | 32                                                                                                                     | 24.9                                  | 62.97                | 33                                 | 10.9                                            | 0.0176         | 0.0206 |
| 15                                               | 31.2                                                                                                                   | 24.1                                  | 60.95                | 32.2                               | 11.1                                            | 0.0176         | 0.0152 |
| 30                                               | 30.2                                                                                                                   | 23.1                                  | 58.42                | 31.2                               | 11.2                                            | 0.0176         | 0.0108 |
| 60                                               | 28.4                                                                                                                   | 21.3                                  | 53.87                | 29.4                               | 11.5                                            | 0.0176         | 0.0077 |
| 120                                              | 27.2                                                                                                                   | 20.1                                  | 50.83                | 28.2                               | 11.7                                            | 0.0176         | 0.0055 |
| 240                                              | 25.2                                                                                                                   | 18.1                                  | 45.78                | 26.2                               | 12                                              | 0.0176         | 0.0039 |
| 480                                              | 23.2                                                                                                                   | 16.1                                  | 40.72                | 24.2                               | 12.4                                            | 0.0176         | 0.0028 |
| 1440                                             | 20                                                                                                                     | 12.9                                  | 32.63                | 21                                 | 12.9                                            | 0.0176         | 0.0017 |
| 2880                                             | 16                                                                                                                     | 8.9                                   | 22.51                | 17                                 | 13.5                                            | 0.0176         | 0.0012 |

#### 4.1.6. Hydrometer Analysis of Sediment Sub-Sample Along the Core Depth (50 - 60)

| LABORATORY TEST DATA SHEET                       |                                                                                                                        |                           |                      |                        |                                              |                |           |
|--------------------------------------------------|------------------------------------------------------------------------------------------------------------------------|---------------------------|----------------------|------------------------|----------------------------------------------|----------------|-----------|
| Hydrometer Analysis of the Soil Sediment         |                                                                                                                        |                           |                      |                        |                                              |                |           |
| Scope:                                           | Determination of the soil particle-size distribution for the fraction that is finer than No. 200 sieve size (0.075 mm) |                           |                      |                        |                                              |                |           |
| Description of soil: (sediment)                  |                                                                                                                        |                           |                      |                        | Sample Location No: P1                       |                |           |
| Location: Lake Nakuru (00°20'52” S, 36°05'37” E) |                                                                                                                        |                           |                      |                        | Minuscus Correction Factor (F <sub>m</sub> ) |                | 1         |
| Sub-sample location on the core, (Cm)            |                                                                                                                        | 50.0 - 60.0               |                      |                        | Temperature Correction (F <sub>T</sub> )     |                | -0.1      |
| Dry weight of the soil, Ws (g)                   |                                                                                                                        | 50                        |                      |                        | Zero Correction Factor (F <sub>Z</sub> )     |                | 7         |
| Temperature of test, T (°C)                      |                                                                                                                        | 19                        |                      |                        | Specific gravity of soil solids, Gs          |                | 1.89      |
| Tested by: Parfait IRADUKUNDA                    |                                                                                                                        |                           |                      |                        | Correction for Gs, a                         |                | 1.3222387 |
| Supervised by:                                   |                                                                                                                        |                           |                      |                        | Date: 24 July 2019                           |                |           |
| Sub-Sample No.6 (Test ID: 50 - 60)               |                                                                                                                        |                           |                      |                        |                                              |                |           |
| Time (t) in Min                                  | Observed H. Reading, R                                                                                                 | Corrected H. Reading, Rcp | Percentage Finer (%) | Corrected Reading, Rcl | Effective Length, L <sup>+</sup> (Cm)        | A <sup>+</sup> | D (Cm)    |
| 0.25                                             | 38                                                                                                                     | 30.9                      | 81.71                | 39                     | 9.9                                          | 0.0184         | 0.1157    |
| 0.5                                              | 37                                                                                                                     | 29.9                      | 79.07                | 38                     | 10.1                                         | 0.0184         | 0.0827    |
| 1                                                | 35.4                                                                                                                   | 28.3                      | 74.84                | 36.4                   | 10.3                                         | 0.0184         | 0.0590    |
| 2                                                | 35.2                                                                                                                   | 28.1                      | 74.31                | 36.2                   | 10.4                                         | 0.0184         | 0.0419    |
| 4                                                | 34.8                                                                                                                   | 27.7                      | 73.25                | 35.8                   | 10.4                                         | 0.0184         | 0.0297    |
| 8                                                | 34.4                                                                                                                   | 27.3                      | 72.19                | 35.4                   | 10.5                                         | 0.0184         | 0.0211    |
| 15                                               | 33.8                                                                                                                   | 26.7                      | 70.61                | 34.8                   | 10.6                                         | 0.0184         | 0.0155    |
| 30                                               | 32.6                                                                                                                   | 25.5                      | 67.43                | 33.6                   | 10.8                                         | 0.0184         | 0.0110    |
| 60                                               | 31.2                                                                                                                   | 24.1                      | 63.73                | 32.2                   | 11.1                                         | 0.0184         | 0.0079    |
| 120                                              | 29.2                                                                                                                   | 22.1                      | 58.44                | 30.2                   | 11.4                                         | 0.0184         | 0.0057    |
| 240                                              | 26.6                                                                                                                   | 19.5                      | 51.57                | 27.6                   | 11.8                                         | 0.0184         | 0.0041    |
| 480                                              | 24                                                                                                                     | 16.9                      | 44.69                | 25                     | 12.2                                         | 0.0184         | 0.0029    |
| 1440                                             | 21                                                                                                                     | 13.9                      | 36.76                | 22                     | 12.7                                         | 0.0184         | 0.0017    |
| 2880                                             | 17                                                                                                                     | 9.9                       | 26.18                | 18                     | 13.3                                         | 0.0184         | 0.0012    |

#### 4.1.7. Hydrometer Analysis of Sediment Sub-Sample Along the Core Depth (60 - 70)

| LABORATORY TEST DATA SHEET                       |                                                                                                                        |                                             |                         |                                          |                                                 |                |               |
|--------------------------------------------------|------------------------------------------------------------------------------------------------------------------------|---------------------------------------------|-------------------------|------------------------------------------|-------------------------------------------------|----------------|---------------|
| Hydrometer Analysis of the Soil Sediment         |                                                                                                                        |                                             |                         |                                          |                                                 |                |               |
| Scope:                                           | Determination of the soil particle-size distribution for the fraction that is finer than No. 200 sieve size (0.075 mm) |                                             |                         |                                          |                                                 |                |               |
| Description of soil: (sediment)                  |                                                                                                                        |                                             |                         |                                          | Sample Location: P1                             |                |               |
| Location: Lake Nakuru (00°20'52” S, 36°05'37” E) |                                                                                                                        |                                             |                         |                                          | Minuscus Correction Factor (F <sub>m</sub> )    |                | 1             |
| Sub-sample location on the core, (Cm)            |                                                                                                                        | 60.0 - 70.0                                 |                         |                                          | Temperature Correction (F <sub>T</sub> )        |                | -0.1          |
| Dry weight of the soil, W <sub>s</sub> (g)       |                                                                                                                        | 50                                          |                         |                                          | Zero Correction Factor (F <sub>Z</sub> )        |                | 7             |
| Temperature of test, T (°C)                      |                                                                                                                        | 19                                          |                         |                                          | Specific gravity of soil solids, G <sub>s</sub> |                | 1.69          |
| Tested by: Parfait IRADUKUNDA                    |                                                                                                                        |                                             |                         |                                          | Correction for G <sub>s</sub> , a               |                | 1.52502<br>05 |
| Supervised by:                                   |                                                                                                                        |                                             |                         |                                          | Date: 24 July 2019                              |                |               |
| Sub-Sample No.7 (Test ID: 60 - 70)               |                                                                                                                        |                                             |                         |                                          |                                                 |                |               |
| Time (t)<br>in Min                               | Observed H.<br>Reading,<br>R                                                                                           | Corrected H.<br>Reading,<br>R <sub>cp</sub> | Percentage<br>Finer (%) | Corrected<br>Reading,<br>R <sub>cl</sub> | Effective<br>Length, L <sup>+</sup><br>(Cm)     | A <sup>+</sup> | D (Cm)        |
| 0.25                                             | 36                                                                                                                     | 28.9                                        | 88.15                   | 37                                       | 10.2                                            | 0.0209         | 0.1334        |
| 0.5                                              | 35                                                                                                                     | 27.9                                        | 85.10                   | 36                                       | 10.4                                            | 0.0209         | 0.0953        |
| 1                                                | 33.2                                                                                                                   | 26.1                                        | 79.61                   | 34.2                                     | 10.7                                            | 0.0209         | 0.0683        |
| 2                                                | 32.4                                                                                                                   | 25.3                                        | 77.17                   | 33.4                                     | 10.8                                            | 0.0209         | 0.0485        |
| 4                                                | 32.2                                                                                                                   | 25.1                                        | 76.56                   | 33.2                                     | 10.9                                            | 0.0209         | 0.0345        |
| 8                                                | 31.8                                                                                                                   | 24.7                                        | 75.34                   | 32.8                                     | 10.9                                            | 0.0209         | 0.0244        |
| 15                                               | 30.6                                                                                                                   | 23.5                                        | 71.68                   | 31.6                                     | 11.1                                            | 0.0209         | 0.0180        |
| 30                                               | 30                                                                                                                     | 22.9                                        | 69.85                   | 31                                       | 11.2                                            | 0.0209         | 0.0128        |
| 60                                               | 28.8                                                                                                                   | 21.7                                        | 66.19                   | 29.8                                     | 11.4                                            | 0.0209         | 0.0091        |
| 120                                              | 27.4                                                                                                                   | 20.3                                        | 61.92                   | 28.4                                     | 11.6                                            | 0.0209         | 0.0065        |
| 240                                              | 25.2                                                                                                                   | 18.1                                        | 55.21                   | 26.2                                     | 12                                              | 0.0209         | 0.0047        |
| 480                                              | 23                                                                                                                     | 15.9                                        | 48.50                   | 24                                       | 12.4                                            | 0.0209         | 0.0034        |
| 1440                                             | 20.8                                                                                                                   | 13.7                                        | 41.79                   | 21.8                                     | 12.7                                            | 0.0209         | 0.0020        |
| 2880                                             | 16                                                                                                                     | 8.9                                         | 27.15                   | 17                                       | 13.5                                            | 0.0209         | 0.0014        |

#### 4.1.8. Hydrometer Analysis of Sediment Sub-Sample Along the Core Depth (70 - 80)

| LABORATORY TEST DATA SHEET                       |                                                                                                                        |                                       |                      |                                    |                                                 |                |        |
|--------------------------------------------------|------------------------------------------------------------------------------------------------------------------------|---------------------------------------|----------------------|------------------------------------|-------------------------------------------------|----------------|--------|
| Hydrometer Analysis of the Soil Sediment         |                                                                                                                        |                                       |                      |                                    |                                                 |                |        |
| Scope:                                           | Determination of the soil particle-size distribution for the fraction that is finer than No. 200 sieve size (0.075 mm) |                                       |                      |                                    |                                                 |                |        |
| Description of soil: (sediment)                  |                                                                                                                        |                                       |                      |                                    | Sample Location: P1                             |                |        |
| Location: Lake Nakuru (00°20'52" S, 36°05'37" E) |                                                                                                                        |                                       |                      |                                    | Minuscus Correction Factor (F <sub>m</sub> )    | 1              |        |
| Sub-sample location on the core, (Cm)            |                                                                                                                        | 70.0 - 80.0                           |                      |                                    | Temperature Correction (F <sub>T</sub> )        | -0.1           |        |
| Dry weight of the soil, W <sub>s</sub> (g)       |                                                                                                                        | 50                                    |                      |                                    | Zero Correction Factor (F <sub>Z</sub> )        | 7              |        |
| Temperature of test, T (°C)                      |                                                                                                                        | 19                                    |                      |                                    | Specific gravity of soil solids, G <sub>s</sub> | 1.7            |        |
| Tested by: Parfait IRADUKUNDA                    |                                                                                                                        |                                       |                      |                                    | Correction for G <sub>s</sub> , a               | 1.5121294      |        |
| Supervised by:                                   |                                                                                                                        |                                       |                      |                                    | Date: 24 July 2019                              |                |        |
| Sub-Sample No.8 (Test ID: 70 - 80)               |                                                                                                                        |                                       |                      |                                    |                                                 |                |        |
| Time (t) in Min                                  | Observed H. Reading, R                                                                                                 | Corrected H. Reading, R <sub>cp</sub> | Percentage Finer (%) | Corrected Reading, R <sub>cl</sub> | Effective Length, L <sup>+</sup> (Cm)           | A <sup>+</sup> | D (Cm) |
| 0.25                                             | 36                                                                                                                     | 28.9                                  | 87.40                | 37                                 | 10.2                                            | 0.0207         | 0.1325 |
| 0.5                                              | 34.7                                                                                                                   | 27.6                                  | 83.47                | 35.7                               | 10.3                                            | 0.0207         | 0.0941 |
| 1                                                | 33.2                                                                                                                   | 26.1                                  | 78.93                | 34.2                               | 10.7                                            | 0.0207         | 0.0678 |
| 2                                                | 32.6                                                                                                                   | 25.5                                  | 77.12                | 33.6                               | 10.8                                            | 0.0207         | 0.0482 |
| 4                                                | 32.2                                                                                                                   | 25.1                                  | 75.91                | 33.2                               | 10.9                                            | 0.0207         | 0.0342 |
| 8                                                | 31.4                                                                                                                   | 24.3                                  | 73.49                | 32.4                               | 11                                              | 0.0207         | 0.0243 |
| 15                                               | 30.8                                                                                                                   | 23.7                                  | 71.67                | 31.8                               | 11.1                                            | 0.0207         | 0.0178 |
| 30                                               | 30                                                                                                                     | 22.9                                  | 69.26                | 31                                 | 11.2                                            | 0.0207         | 0.0127 |
| 60                                               | 28.8                                                                                                                   | 21.7                                  | 65.63                | 29.8                               | 11.4                                            | 0.0207         | 0.0090 |
| 120                                              | 27                                                                                                                     | 19.9                                  | 60.18                | 28                                 | 11.7                                            | 0.0207         | 0.0065 |
| 240                                              | 25.8                                                                                                                   | 18.7                                  | 56.55                | 26.8                               | 11.9                                            | 0.0207         | 0.0046 |
| 480                                              | 23.8                                                                                                                   | 16.7                                  | 50.51                | 24.8                               | 12.2                                            | 0.0207         | 0.0033 |
| 1440                                             | 21                                                                                                                     | 13.9                                  | 42.04                | 22                                 | 12.7                                            | 0.0207         | 0.0019 |
| 2880                                             | 17                                                                                                                     | 9.9                                   | 29.94                | 18                                 | 13.3                                            | 0.0207         | 0.0014 |



**4.2. Hydrometer Analysis Grading Curves for Sub-Samples Along the Core Depth (0 – 80) of the Sediment Sample from Location P1**

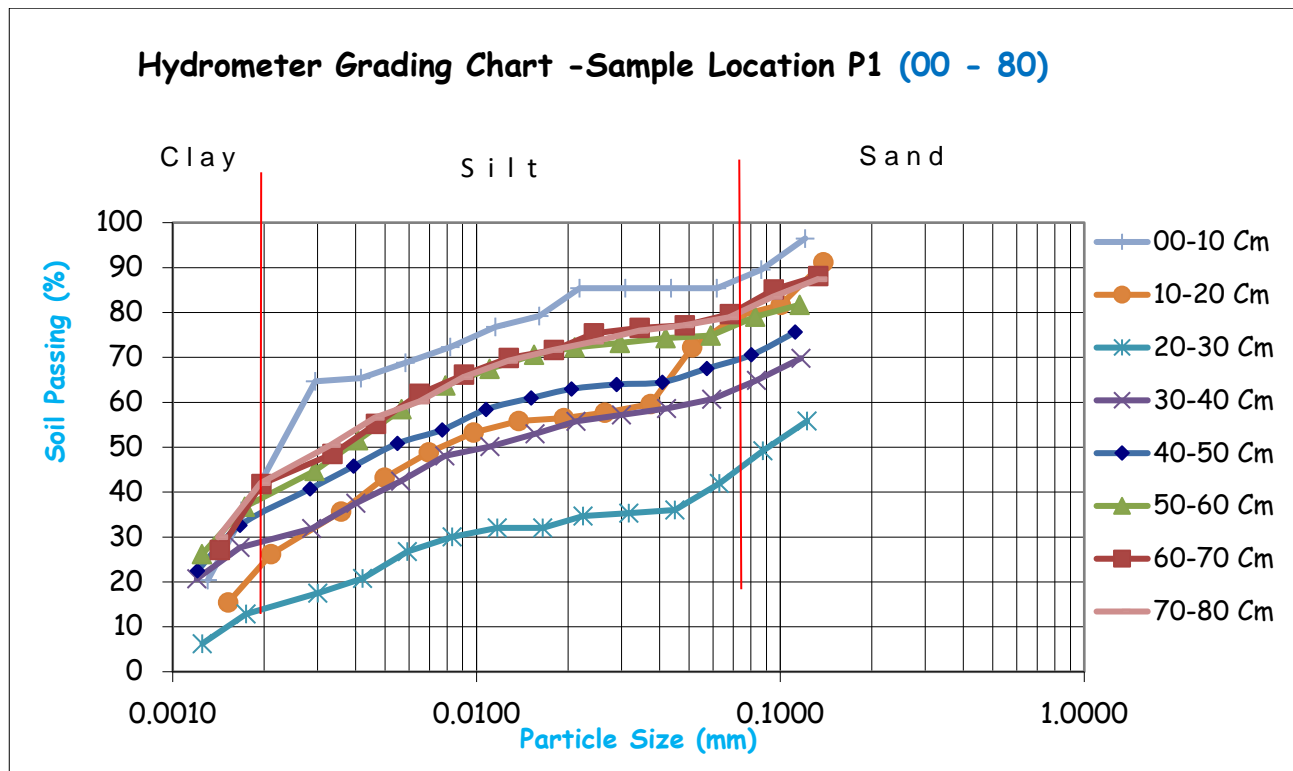

**4.3. Hydrometer Analysis Ratio of the Sediment Soil Types Along with the Core Depth (0 - 80) for the Sediment Sample from Location P1**

| Sample P1, Sub-Sample No.1 (Test ID: 0 - 10) |        |                          | AASHTO M145/T88                |      |
|----------------------------------------------|--------|--------------------------|--------------------------------|------|
| Particles finer than 60%, $D_{60}$ (mm)      | 0.0027 | approximately equal size | Fine-Sand                      | 13%  |
| Particles finer than 30%, $D_{30}$ (mm)      | 0.0016 |                          | Silt                           | 43%  |
| Particles finer than 10%, $D_{10}$ (mm)      | 0.0012 |                          | Clay                           | <44% |
| Uniformity coefficient, $C_u$                | 2.25   | approximately equal size | Soil Description:<br>Silt Clay |      |
| Curvature coefficient, $C_c$                 | 0.79   |                          |                                |      |

| Sample P1, Sub-Sample No.2 (Test ID: 10 - 20) |        |                          | AASHTO M145/T88                |      |
|-----------------------------------------------|--------|--------------------------|--------------------------------|------|
| Particles finer than 60%, $D_{60}$ (mm)       | 0.038  | approximately equal size | Fine-Sand                      | 20%  |
| Particles finer than 30%, $D_{30}$ (mm)       | 0.0027 |                          | Silt                           | 55%  |
| Particles finer than 10%, $D_{10}$ (mm)       | 0.0015 |                          | Clay                           | <25% |
| Uniformity coefficient, $C_u$                 | 25.33  | approximately equal size | Soil Description:<br>Silt Loam |      |
| Curvature coefficient, $C_c$                  | 0.13   |                          |                                |      |

| Sample P1, Sub-Sample No.3 (Test ID: 20 - 30)  |        |                          | AASHTO M145/T88                 |      |
|------------------------------------------------|--------|--------------------------|---------------------------------|------|
| Particles finer than 60%, D <sub>60</sub> (mm) | 0.16   |                          | Fine-Sand                       | 54%  |
| Particles finer than 30%, D <sub>30</sub> (mm) | 0.0085 |                          | Silt                            | 32%  |
| Particles finer than 10%, D <sub>10</sub> (mm) | 0.0016 |                          | Clay                            | <14% |
| Uniformity coefficient, Cu                     | 100.00 | approximately equal size | Soil Description:<br>Sandy Loam |      |
| Curvature coefficient, Cc                      | 0.28   |                          |                                 |      |

| Sample P1, Sub-Sample No.4 (Test ID: 30 - 40)  |        |                          | AASHTO M145/T88                |      |
|------------------------------------------------|--------|--------------------------|--------------------------------|------|
| Particles finer than 60%, D <sub>60</sub> (mm) | 0.065  |                          | Fine-Sand                      | 36%  |
| Particles finer than 30%, D <sub>30</sub> (mm) | 0.0023 |                          | Silt                           | 35%  |
| Particles finer than 10%, D <sub>10</sub> (mm) | 0.001  |                          | Clay                           | <29% |
| Uniformity coefficient, Cu                     | 65.00  | approximately equal size | Soil Description:<br>Clay Loam |      |
| Curvature coefficient, Cc                      | 0.08   |                          |                                |      |

| Sample P1, Sub-Sample No.5 (Test ID: 40 - 50)  |        |                          | AASHTO M145/T88                |      |
|------------------------------------------------|--------|--------------------------|--------------------------------|------|
| Particles finer than 60%, D <sub>60</sub> (mm) | 0.014  |                          | Fine-Sand                      | 30%  |
| Particles finer than 30%, D <sub>30</sub> (mm) | 0.0016 |                          | Silt                           | 34%  |
| Particles finer than 10%, D <sub>10</sub> (mm) | 0.0012 |                          | Clay                           | <36% |
| Uniformity coefficient, Cu                     | 11.67  | approximately equal size | Soil Description:<br>Clay Loam |      |
| Curvature coefficient, Cc                      | 0.15   |                          |                                |      |

| Sample P1, Sub-Sample No.6 (Test ID: 50 - 60)  |        |                          | AASHTO M145/T88                |      |
|------------------------------------------------|--------|--------------------------|--------------------------------|------|
| Particles finer than 60%, D <sub>60</sub> (mm) | 0.0062 |                          | Fine-Sand                      | 22%  |
| Particles finer than 30%, D <sub>30</sub> (mm) | 0.0014 |                          | Silt                           | 39%  |
| Particles finer than 10%, D <sub>10</sub> (mm) | 0.001  |                          | Clay                           | <39% |
| Uniformity coefficient, Cu                     | 6.20   | approximately equal size | Soil Description:<br>Clay Loam |      |
| Curvature coefficient, Cc                      | 0.32   |                          |                                |      |

| Sample P1, Sub-Sample No.7 (Test ID: 60 - 70)  |        |                          | AASHTO M145/T88           |      |
|------------------------------------------------|--------|--------------------------|---------------------------|------|
| Particles finer than 60%, D <sub>60</sub> (mm) | 0.0058 |                          | Fine-Sand                 | 18%  |
| Particles finer than 30%, D <sub>30</sub> (mm) | 0.0016 |                          | Silt                      | 39%  |
| Particles finer than 10%, D <sub>10</sub> (mm) | 0.0013 |                          | Clay                      | <43% |
| Uniformity coefficient, Cu                     | 4.46   | approximately equal size | Soil Description:<br>Clay |      |
| Curvature coefficient, Cc                      | 0.34   |                          |                           |      |

| Sample P1, Sub-Sample No.8 (Test ID: 70 - 80)  |        |                          | AASHTO M145/T88           |      |
|------------------------------------------------|--------|--------------------------|---------------------------|------|
| Particles finer than 60%, D <sub>60</sub> (mm) | 0.0065 |                          | Fine-Sand                 | 20%  |
| Particles finer than 30%, D <sub>30</sub> (mm) | 0.0015 |                          | Silt                      | 38%  |
| Particles finer than 10%, D <sub>10</sub> (mm) | 0.0011 |                          | Clay                      | <42% |
| Uniformity coefficient, Cu                     | 5.91   | approximately equal size | Soil Description:<br>Clay |      |
| Curvature coefficient, Cc                      | 0.31   |                          |                           |      |

| Sample P1, Core Summary (ID: 0 - 80)    |        |                          | AASHTO M145/T88                |        |
|-----------------------------------------|--------|--------------------------|--------------------------------|--------|
| Particles finer than 60%, $D_{60}$ (mm) | 0.0065 |                          | Fine-Sand                      | 26.63% |
| Particles finer than 30%, $D_{30}$ (mm) | 0.0015 |                          | Silt                           | 39.38% |
| Particles finer than 10%, $D_{10}$ (mm) | 0.0011 |                          | Clay                           | 34.00% |
| Uniformity coefficient, $C_u$           | 5.91   | approximately equal size | Soil Description:<br>Clay Loam |        |
| Curvature coefficient, $C_c$            | 0.31   |                          |                                |        |

| Sample P1, Soil Ratio Summary Along the Core Depth |               |          |          |                 |
|----------------------------------------------------|---------------|----------|----------|-----------------|
| Depth                                              | Fine-Sand (%) | Silt (%) | Clay (%) | Silt + Clay (%) |
| 10                                                 | 13%           | 43%      | 44%      | 87%             |
| 20                                                 | 20%           | 55%      | 25%      | 80%             |
| 30                                                 | 54%           | 32%      | 14%      | 46%             |
| 40                                                 | 36%           | 35%      | 29%      | 64%             |
| 50                                                 | 30%           | 34%      | 36%      | 70%             |
| 60                                                 | 22%           | 39%      | 39%      | 78%             |
| 70                                                 | 18%           | 39%      | 43%      | 82%             |
| 80                                                 | 20%           | 38%      | 42%      | 80%             |
| Total                                              | 26.63%        | 39.38%   | 34.00%   |                 |

**4.4. Graph of Hydrometer Analysis Ratio of the Sediment Soil Types Along with the Core Depth (0 - 80) for the Sediment Sample from Location P1**

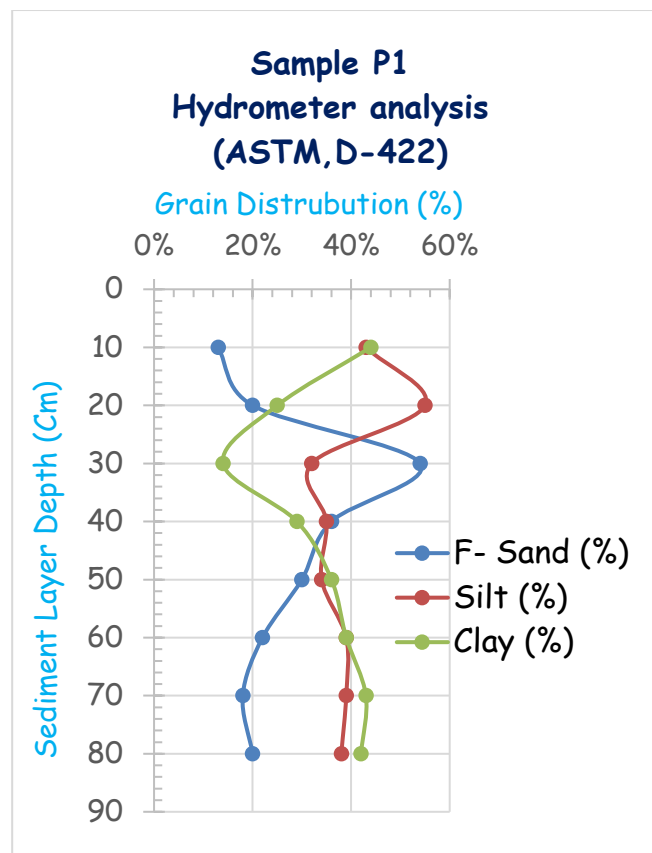

Supplement: f1 [file 8889189.f1.zip]
