# Supplementary material for: Impact of Sedimentation on Water Seepage Capacity in Lake Nakuru, Kenya
Source: Hindawi journal article supplement (doi:10.1155/2021/8889189), 2021-02-16

### SUPPLEMENTARY FILES-3

#### Supplementary Files for Article Entitled: “Impact of Sedimentation on Water Seepage Capacity in Lake Nakuru”

### 3.1. Sieve Analysis of Sediment Sub-Sample Along the Core Depth

#### 3.1.1. Sieve Analysis of Sediment Sub-Sample Along the Core Depth (0 - 10)

| LABORATORY TEST DATA SHEET                     |                          |                      |                         |                                   |                            |                        |
|------------------------------------------------|--------------------------|----------------------|-------------------------|-----------------------------------|----------------------------|------------------------|
| PARTICLE SIZE DISTRIBUTION (Sieve Analysis)    |                          |                      |                         |                                   |                            |                        |
| Sample Location: P2 (00°20'31” S, 36°05'10” E) |                          |                      |                         | Sub-Sample No.:1 (0 - 10)         |                            |                        |
| Description of soil: Sediment (L. Nakuru)      |                          |                      |                         | Date: 29/07/2019                  |                            |                        |
| Dry Sieving                                    |                          |                      |                         | Wet Sieving through 74µm          |                            |                        |
| Weight of Dry Soil + Tray (g)                  | 345.60                   |                      |                         | Weight of Dry Soil + Tray (g)     | 304.68                     |                        |
| Weight of Tray (g)                             | 259.84                   |                      |                         | Weight of Tray (g)                | 259.84                     |                        |
| Wt of Dry Soil Screened (g)                    | 85.76                    |                      |                         | Dry Soil retained on 75µm (g)     | 44.84                      |                        |
|                                                |                          |                      |                         |                                   |                            |                        |
| Wet Sieving through 2mm                        |                          |                      |                         | Check On Original Specimen:       |                            |                        |
| Weight of Dry Soil +Tray (g)                   | 265.96                   |                      |                         | 1) Percent passing 2.0mm          | 92.86                      |                        |
| Weight of Tray (g)                             | 259.84                   |                      |                         | 2) Soil washed thro 0.074mm sieve | 47.71                      |                        |
| Weight of Dry Soil retained on 2mm (g)         | 6.12                     |                      |                         | 3) Soil Lost upon grading (%)     | 1.10                       |                        |
|                                                |                          |                      |                         |                                   |                            |                        |
| Sieve Size (mm)                                | Wt of Sieve and Soil (g) | Wt of Sieve only (g) | Wt of Soil Retained (g) | Cumulative Wt Retained (g)        | Soil Retained on Sieve (%) | Soil Passing Sieve (%) |
| 19.1                                           | 586.2                    | 586.2                | 0.0                     | 0.0                               | 0.000                      | 100.00                 |
| 9.52                                           | 518.82                   | 518.30               | 0.5                     | 0.5                               | 0.606                      | 99.39                  |
| 4.76                                           | 474.02                   | 472.80               | 1                       | 1.7                               | 2.029                      | 97.97                  |
| 2.00                                           | 465.06                   | 460.68               | 4.4                     | 6.1                               | 7.136                      | 92.86                  |
| 0.84                                           | 420.64                   | 412.28               | 8.4                     | 14.5                              | 16.884                     | 83.12                  |
| 0.42                                           | 410.98                   | 404.40               | 6.6                     | 21.1                              | 24.557                     | 75.44                  |
| 0.25                                           | 387.54                   | 381.98               | 5.6                     | 26.6                              | 31.040                     | 68.96                  |
| 0.105                                          | 369.84                   | 358.16               | 11.7                    | 38.3                              | 44.660                     | 55.34                  |
| 0.074                                          | 351.76                   | 346.94               | 4.8                     | 43.1                              | 50.280                     | 49.72                  |
| Pan                                            | 354.08                   | 353.30               | 0.8                     | 43.9                              | 51.189                     | 48.81                  |

### 3.1.2. Sieve Analysis of Sediment Sub-Sample Along the Core Depth (10 - 20)

| <b>LABORATORY TEST DATA SHEET</b><br><b>PARTICLE SIZE DISTRIBUTION (Sieve Analysis)</b><br><b>Sample Location: P2 (00°20'31" S, 36°05'10" E)</b><br><b>Description of soil: Sediment (L. Nakuru)</b> |                          |                      |                         |                                   |                            |                        |
|------------------------------------------------------------------------------------------------------------------------------------------------------------------------------------------------------|--------------------------|----------------------|-------------------------|-----------------------------------|----------------------------|------------------------|
| <i>Dry Sieving</i>                                                                                                                                                                                   |                          |                      |                         | <i>Wet Sieving through 74µm</i>   |                            |                        |
| Weight of Dry Soil + Tray (g)                                                                                                                                                                        |                          | 341.06               |                         | Weight of Dry Soil + Tray (g)     |                            | 329.74                 |
| Weight of Tray (g)                                                                                                                                                                                   |                          | 253.73               |                         | Weight of Tray (g)                |                            | 253.73                 |
| Wt of Dry Soil Screened (g)                                                                                                                                                                          |                          | 87.33                |                         | Dry Soil retained on 75µm (g)     |                            | 76.01                  |
| <i>Wet Sieving through 2mm</i>                                                                                                                                                                       |                          |                      |                         | <i>Check On Original Specimen</i> |                            |                        |
| Weight of Dry Soil + Tray (g)                                                                                                                                                                        |                          | 269.47               |                         | 1) Percent passing 2.0mm          |                            | 81.98                  |
| Weight of Tray (g)                                                                                                                                                                                   |                          | 253.73               |                         | 2) Soil washed thro 0.074mm sieve |                            | 12.96                  |
| Weight of Dry Soil retained on 2mm (g)                                                                                                                                                               |                          | 15.74                |                         | 3) Soil Lost upon grading (%)     |                            | 0.54                   |
| Sieve Size (mm)                                                                                                                                                                                      | Wt of Sieve and Soil (g) | Wt of Sieve only (g) | Wt of Soil Retained (g) | Cumulative Wt Retained (g)        | Soil Retained on Sieve (%) | Soil Passing Sieve (%) |
| 19.1                                                                                                                                                                                                 | 586.2                    | 586.2                | 0.0                     | 0.0                               | 0.000                      | 100.00                 |
| 9.52                                                                                                                                                                                                 | 518.72                   | 518.30               | 0.4                     | 0.4                               | 0.481                      | 99.52                  |
| 4.76                                                                                                                                                                                                 | 477.90                   | 472.80               | 5                       | 5.5                               | 6.321                      | 93.68                  |
| 2.00                                                                                                                                                                                                 | 470.90                   | 460.68               | 10.2                    | 15.7                              | 18.024                     | 81.98                  |
| 0.84                                                                                                                                                                                                 | 426.70                   | 412.28               | 14.4                    | 30.2                              | 34.536                     | 65.46                  |
| 0.42                                                                                                                                                                                                 | 418.70                   | 404.40               | 14.3                    | 44.5                              | 50.910                     | 49.09                  |
| 0.25                                                                                                                                                                                                 | 393.82                   | 381.98               | 11.8                    | 56.3                              | 64.468                     | 35.53                  |
| 0.105                                                                                                                                                                                                | 371.36                   | 358.16               | 13.2                    | 69.5                              | 79.583                     | 20.42                  |
| 0.074                                                                                                                                                                                                | 351.72                   | 346.94               | 4.8                     | 74.3                              | 85.057                     | 14.94                  |
| Pan                                                                                                                                                                                                  | 354.56                   | 353.30               | 1.3                     | 75.5                              | 86.499                     | 13.50                  |

### 3.1.3. Sieve Analysis of Sediment Sub-Sample Along the Core Depth (20 - 30)

| LABORATORY TEST DATA SHEET                     |                          |                      |                         |                                   |                            |                        |
|------------------------------------------------|--------------------------|----------------------|-------------------------|-----------------------------------|----------------------------|------------------------|
| PARTICLE SIZE DISTRIBUTION (Sieve Analysis)    |                          |                      |                         |                                   |                            |                        |
| Sample Location: P2 (00°20'31” S, 36°05'10” E) |                          |                      |                         | Sub-Sample No.:3 (20-30)          |                            |                        |
| Description of soil: Sediment (L. Nakuru)      |                          |                      |                         | Date: 29/07/2019                  |                            |                        |
| Dry Sieving                                    |                          |                      |                         | Wet Sieving through 74µm          |                            |                        |
| Weight of Dry Soil + Tray (g)                  | 346.08                   |                      |                         | Weight of Dry Soil + Tray (g)     | 334.44                     |                        |
| Weight of Tray (g)                             | 254.14                   |                      |                         | Weight of Tray (g)                | 254.14                     |                        |
| Wt of Dry Soil Screened (g)                    | 91.94                    |                      |                         | Dry Soil retained on 75µm (g)     | 80.30                      |                        |
| Wet Sieving through 2mm                        |                          |                      |                         | Check On Original Specimen        |                            |                        |
| Weight of Dry Soil + Tray (g)                  | 270.74                   |                      |                         | 1) Percent passing 2.0mm          | 81.94                      |                        |
| Weight of Tray (g)                             | 254.14                   |                      |                         | 2) Soil washed thro 0.074mm sieve | 12.66                      |                        |
| Weight of Dry Soil retained on 2mm (g)         | 16.60                    |                      |                         | 3) Soil Lost upon grading (%)     | 0.57                       |                        |
| Sieve Size (mm)                                | Wt of Sieve and Soil (g) | Wt of Sieve only (g) | Wt of Soil Retained (g) | Cumulative Wt Retained (g)        | Soil Retained on Sieve (%) | Soil Passing Sieve (%) |
| 19.1                                           | 586.2                    | 586.2                | 0.0                     | 0.0                               | 0.000                      | 100.00                 |
| 9.52                                           | 519.10                   | 518.30               | 0.8                     | 0.8                               | 0.870                      | 99.13                  |
| 4.76                                           | 477.06                   | 472.80               | 4                       | 5.1                               | 5.504                      | 94.50                  |
| 2.00                                           | 472.22                   | 460.68               | 11.5                    | 16.6                              | 18.055                     | 81.94                  |
| 0.84                                           | 429.52                   | 412.28               | 17.2                    | 33.8                              | 36.807                     | 63.19                  |
| 0.42                                           | 422.54                   | 404.40               | 18.1                    | 52.0                              | 56.537                     | 43.46                  |
| 0.25                                           | 400.48                   | 381.98               | 18.5                    | 70.5                              | 76.659                     | 23.34                  |
| 0.105                                          | 365.44                   | 358.16               | 7.3                     | 77.8                              | 84.577                     | 15.42                  |
| 0.074                                          | 348.02                   | 346.94               | 1.1                     | 78.8                              | 85.752                     | 14.25                  |
| Pan                                            | 354.24                   | 353.30               | 0.9                     | 79.8                              | 86.774                     | 13.23                  |

### 3.1.4. Sieve Analysis of Sediment Sub-Sample Along the Core Depth (30 - 40)

| LABORATORY TEST DATA SHEET                     |                          |                               |                             |                                   |                            |                        |
|------------------------------------------------|--------------------------|-------------------------------|-----------------------------|-----------------------------------|----------------------------|------------------------|
| PARTICLE SIZE DISTRIBUTION (Sieve Analysis)    |                          |                               |                             |                                   |                            |                        |
| Sample Location: P2 (00°20'31” S, 36°05'10” E) |                          |                               |                             | Sub-Sample No.:4 (30-40)          |                            |                        |
| Description of soil: Sediment (L. Nakuru)      |                          |                               |                             | Date: 29/07/2019                  |                            |                        |
| Dry Sieving                                    |                          |                               |                             | Wet Sieving through 74µm          |                            |                        |
| Weight of Dry Soil + Tray (g)                  | 352.83                   | Weight of Dry Soil + Tray (g) |                             | 340.82                            |                            |                        |
| Weight of Tray (g)                             | 261.42                   | Weight of Tray (g)            |                             | 261.42                            |                            |                        |
| Wt of Dry Soil Screened (g)                    | 91.41                    | Dry Soil retained on 75µm (g) |                             | 79.40                             |                            |                        |
|                                                |                          |                               |                             |                                   |                            |                        |
| Wet Sieving through 2mm                        |                          |                               | Check On Original Specimen: |                                   |                            |                        |
| Weight of Dry Soil + Tray (g)                  | 278.36                   |                               |                             | 1) Percent passing 2.0mm          | 81.47                      |                        |
| Weight of Tray (g)                             | 261.42                   |                               |                             | 2) Soil washed thro 0.074mm sieve | 13.14                      |                        |
| Weight of Dry Soil retained on 2mm (g)         | 16.94                    |                               |                             | 3) Soil Lost upon grading (%)     | 0.81                       |                        |
|                                                |                          |                               |                             |                                   |                            |                        |
| Sieve Size (mm)                                | Wt of Sieve and Soil (g) | Wt of Sieve only (g)          | Wt of Soil Retained (g)     | Cumulative Wt Retained (g)        | Soil Retained on Sieve (%) | Soil Passing Sieve (%) |
| 19.1                                           | 586.2                    | 586.2                         | 0.0                         | 0.0                               | 0.000                      | 100.00                 |
| 9.52                                           | 519.90                   | 518.30                        | 1.6                         | 1.6                               | 1.750                      | 98.25                  |
| 4.76                                           | 477.94                   | 472.80                        | 5                           | 6.7                               | 7.373                      | 92.63                  |
| 2.00                                           | 470.88                   | 460.68                        | 10.2                        | 16.9                              | 18.532                     | 81.47                  |
| 0.84                                           | 429.40                   | 412.28                        | 17.1                        | 34.1                              | 37.261                     | 62.74                  |
| 0.42                                           | 421.30                   | 404.40                        | 16.9                        | 51.0                              | 55.749                     | 44.25                  |
| 0.25                                           | 395.04                   | 381.98                        | 13.1                        | 64.0                              | 70.036                     | 29.96                  |
| 0.105                                          | 370.58                   | 358.16                        | 12.4                        | 76.4                              | 83.623                     | 16.38                  |
| 0.074                                          | 349.06                   | 346.94                        | 2.1                         | 78.6                              | 85.942                     | 14.06                  |
| Pan                                            | 353.40                   | 353.30                        | 0.1                         | 78.7                              | 86.052                     | 13.95                  |

### 3.1.5. Sieve Analysis of Sediment Sub-Sample Along the Core Depth (40 - 50)

| LABORATORY TEST DATA SHEET                     |                          |                      |                         |                                   |                            |                        |
|------------------------------------------------|--------------------------|----------------------|-------------------------|-----------------------------------|----------------------------|------------------------|
| PARTICLE SIZE DISTRIBUTION (Sieve Analysis)    |                          |                      |                         |                                   |                            |                        |
| Sample Location: P2 (00°20'31” S, 36°05'10” E) |                          |                      |                         | Sub-Sample No.:5 (40-50)          |                            |                        |
| Description of soil: Sediment (L. Nakuru)      |                          |                      |                         | Date: 29/07/2019                  |                            |                        |
| Dry Sieving                                    |                          |                      |                         | Wet Sieving through 74µm          |                            |                        |
| Weigt of Dry Soil + Tray (g)                   |                          | 473.43               |                         | Weight of Dry Soil + Tray (g)     |                            | 457.56                 |
| Weight of Tray (g)                             |                          | 382.88               |                         | Weight of Tray (g)                |                            | 382.88                 |
| Wt of Dry Soil Screened (g)                    |                          | 90.55                |                         | Dry Soil retained on 75µm (g)     |                            | 74.68                  |
| Wet Sieving through 2mm                        |                          |                      |                         | Check On Original Specimen:       |                            |                        |
| Weight of Dry Soil + Tray (g)                  |                          | 398.20               |                         | 1) Percent passing 2.0mm          |                            | 83.08                  |
| Weight of Tray (g)                             |                          | 382.88               |                         | 2) Soil washed thro 0.074mm sieve |                            | 17.53                  |
| Weight of Dry Soil retained on 2mm (g)         |                          | 15.32                |                         | 3) Soil Lost upon grading (%)     |                            | 0.68                   |
| Sieve Size (mm)                                | Wt of Sieve and Soil (g) | Wt of Sieve only (g) | Wt of Soil Retained (g) | Cumulative Wt Retained (g)        | Soil Retained on Sieve (%) | Soil Passing Sieve (%) |
| 19.1                                           | 586.2                    | 586.2                | 0.0                     | 0.0                               | 0.000                      | 100.00                 |
| 9.52                                           | 518.96                   | 518.30               | 0.7                     | 0.7                               | 0.729                      | 99.27                  |
| 4.76                                           | 476.90                   | 472.80               | 4                       | 4.8                               | 5.257                      | 94.74                  |
| 2.00                                           | 471.24                   | 460.68               | 10.6                    | 15.3                              | 16.919                     | 83.08                  |
| 0.84                                           | 427.06                   | 412.28               | 14.8                    | 30.1                              | 33.241                     | 66.76                  |
| 0.42                                           | 420.20                   | 404.40               | 15.8                    | 45.9                              | 50.690                     | 49.31                  |
| 0.25                                           | 394.86                   | 381.98               | 12.9                    | 58.8                              | 64.914                     | 35.09                  |
| 0.105                                          | 370.56                   | 358.16               | 12.4                    | 71.2                              | 78.609                     | 21.39                  |
| 0.074                                          | 349.80                   | 346.94               | 2.9                     | 74.0                              | 81.767                     | 18.23                  |
| Pan                                            | 353.32                   | 353.30               | 0.0                     | 74.1                              | 81.789                     | 18.21                  |

### 3.1.6. Sieve Analysis of Sediment Sub-Sample Along the Core Depth (50 - 55)

| <b>LABORATORY TEST DATA SHEET</b><br><b>PARTICLE SIZE DISTRIBUTION (Sieve Analysis)</b><br><b>Sample Location: P2 (00°20'31" S, 36°05'10" E)</b><br><b>Description of soil: Sediment (L. Nakuru)</b> |                          |                      |                         |                                   |                            |                        |
|------------------------------------------------------------------------------------------------------------------------------------------------------------------------------------------------------|--------------------------|----------------------|-------------------------|-----------------------------------|----------------------------|------------------------|
| <b>Dry Sieving</b>                                                                                                                                                                                   |                          |                      |                         | <b>Wet Sieving through 74µm</b>   |                            |                        |
| Weight of Dry Soil + Tray (g)                                                                                                                                                                        | 330.80                   |                      |                         | Weight of Dry Soil + Tray (g)     | 322.02                     |                        |
| Weight of Tray (g)                                                                                                                                                                                   | 242.46                   |                      |                         | Weight of Tray (g)                | 242.46                     |                        |
| Wt of Dry Soil Screened (g)                                                                                                                                                                          | 88.34                    |                      |                         | Dry Soil retained on 75µm (g)     | 79.56                      |                        |
| <b>Wet Sieving through 2mm</b>                                                                                                                                                                       |                          |                      |                         | <b>Check On Original Specimen</b> |                            |                        |
| Weight of Dry Soil + Tray (g)                                                                                                                                                                        | 260.64                   |                      |                         | 1) Percent passing 2.0mm          | 79.42                      |                        |
| Weight of Tray (g)                                                                                                                                                                                   | 242.46                   |                      |                         | 2) Soil washed thro 0.074mm sieve | 9.94                       |                        |
| Weight of Dry Soil retained on 2mm (g)                                                                                                                                                               | 18.18                    |                      |                         | 3) Soil Lost upon grading (%)     | 0.25                       |                        |
| Sieve Size (mm)                                                                                                                                                                                      | Wt of Sieve and Soil (g) | Wt of Sieve only (g) | Wt of Soil Retained (g) | Cumulative Wt Retained (g)        | Soil Retained on Sieve (%) | Soil Passing Sieve (%) |
| 19.1                                                                                                                                                                                                 | 586.2                    | 586.2                | 0.0                     | 0.0                               | 0.000                      | 100.00                 |
| 9.52                                                                                                                                                                                                 | 518.36                   | 518.36               | 0.0                     | 0.0                               | 0.000                      | 100.00                 |
| 4.76                                                                                                                                                                                                 | 478.68                   | 472.82               | 6                       | 5.9                               | 6.633                      | 93.37                  |
| 2.00                                                                                                                                                                                                 | 473.14                   | 460.82               | 12.3                    | 18.2                              | 20.580                     | 79.42                  |
| 0.84                                                                                                                                                                                                 | 428.20                   | 412.32               | 15.9                    | 34.1                              | 38.556                     | 61.44                  |
| 0.42                                                                                                                                                                                                 | 421.60                   | 404.10               | 17.5                    | 51.6                              | 58.365                     | 41.63                  |
| 0.25                                                                                                                                                                                                 | 394.72                   | 382.06               | 12.7                    | 64.2                              | 72.696                     | 27.30                  |
| 0.105                                                                                                                                                                                                | 370.46                   | 358.32               | 12.1                    | 76.4                              | 86.439                     | 13.56                  |
| 0.074                                                                                                                                                                                                | 349.72                   | 346.88               | 2.8                     | 79.2                              | 89.654                     | 10.35                  |
| Pan                                                                                                                                                                                                  | 353.44                   | 353.30               | 0.1                     | 79.3                              | 89.812                     | 10.19                  |

**3.2. Sieve Analysis Grading Curves for Sub-Samples Along the Core Depth (0 – 55) of the Sediment Sample from Location P2**

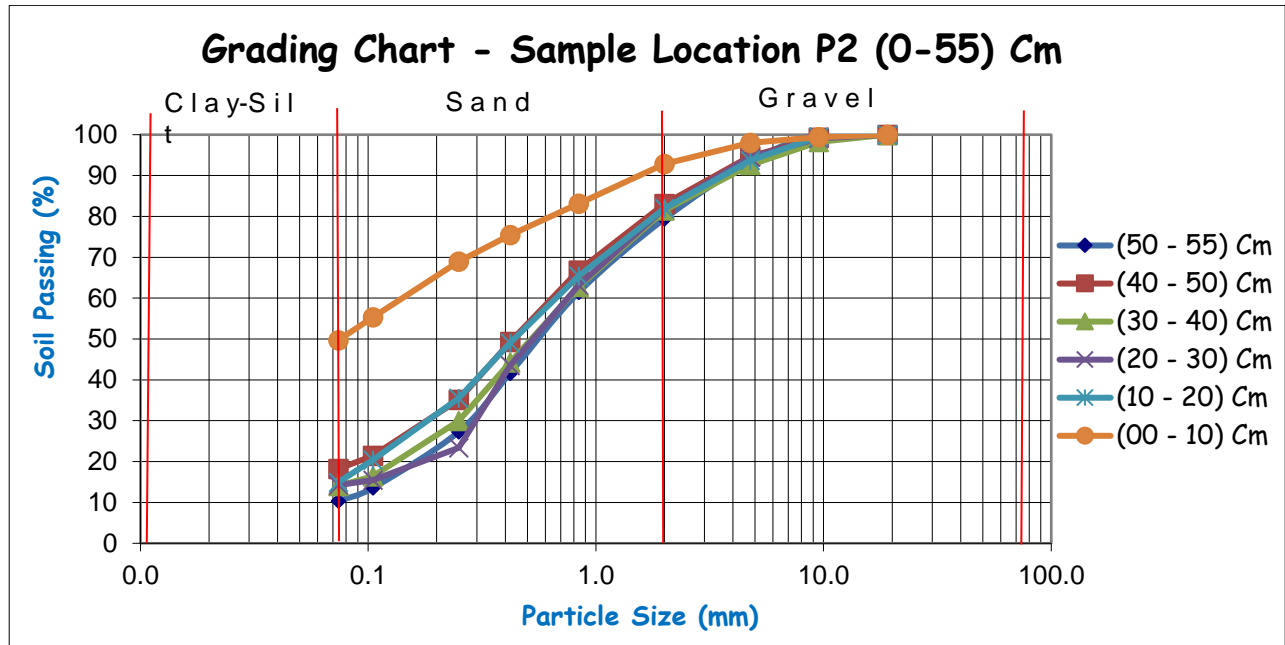

**3.3. Sieve Analysis Ratio of the Sediment Soil Types Along with the Core Depth (0 - 55) for the Sediment Sample from Location P2**

| Sample P2, Sub-Sample No.1 (Test ID: 0 - 10) |       |             | AASHTO M145/T88                |      |
|----------------------------------------------|-------|-------------|--------------------------------|------|
| Particles finer than 60%, $D_{60}$ (mm)      | 0.15  |             | Gravel                         | 7%   |
| Particles finer than 30%, $D_{30}$ (mm)      | 0.022 |             | Sand                           | 43%  |
| Particles finer than 10%, $D_{10}$ (mm)      | 0.002 |             | Fine                           | <50% |
| Uniformity coefficient, $C_u$                | 75.00 | well graded | Soil Description:<br>Fine Soil |      |
| Curvature coefficient, $C_c$                 | 1.61  |             |                                |      |

| Sample P2, Sub-Sample No.2 (Test ID: 10 - 20) |       |             | AASHTO M145/T88                       |      |
|-----------------------------------------------|-------|-------------|---------------------------------------|------|
| Particles finer than 60%, $D_{60}$ (mm)       | 0.65  |             | Gravel                                | 18%  |
| Particles finer than 30%, $D_{30}$ (mm)       | 0.18  |             | Sand                                  | 67%  |
| Particles finer than 10%, $D_{10}$ (mm)       | 0.05  |             | Fine                                  | <15% |
| Uniformity coefficient, $C_u$                 | 13.00 | well graded | Soil Description:<br>Sand & Fine Soil |      |
| Curvature coefficient, $C_c$                  | 1.00  |             |                                       |      |

| Sample P2, Sub-Sample No.3 (Test ID: 20 - 30) |       |               | AASHTO M145/T88                       |      |
|-----------------------------------------------|-------|---------------|---------------------------------------|------|
| Particles finer than 60%, $D_{60}$ (mm)       | 0.75  |               | Gravel                                | 18%  |
| Particles finer than 30%, $D_{30}$ (mm)       | 0.32  |               | Sand                                  | 68%  |
| Particles finer than 10%, $D_{10}$ (mm)       | 0.04  |               | Fine                                  | <14% |
| Uniformity coefficient, $C_u$                 | 18.75 | Poorly graded | Soil Description:<br>Sand & Fine Soil |      |
| Curvature coefficient, $C_c$                  | 3.41  |               |                                       |      |

| Sample P2, Ub-Sample No.4 (Test ID: 30 - 40)   |       |                | AASHTO M145/T88                       |      |
|------------------------------------------------|-------|----------------|---------------------------------------|------|
| Particles finer than 60%, D <sub>60</sub> (mm) | 0.75  | Well<br>graded | Gravel                                | 19%  |
| Particles finer than 30%, D <sub>30</sub> (mm) | 0.25  |                | Sand                                  | 67%  |
| Particles finer than 10%, D <sub>10</sub> (mm) | 0.04  |                | Fine                                  | <14% |
| Uniformity coefficient, Cu                     | 18.75 | Well<br>graded | Soil Description:<br>Sand & Fine Soil |      |
| Curvature coefficient, Cc                      | 2.08  |                |                                       |      |

| Sample P2, Sub-Sample No.5 (Test ID: 40 - 50)  |       |                | AASHTO M145/T88                       |      |
|------------------------------------------------|-------|----------------|---------------------------------------|------|
| Particles finer than 60%, D <sub>60</sub> (mm) | 0.63  | Well<br>graded | Gravel                                | 17%  |
| Particles finer than 30%, D <sub>30</sub> (mm) | 0.19  |                | Sand                                  | 65%  |
| Particles finer than 10%, D <sub>10</sub> (mm) | 0.025 |                | Fine                                  | <18% |
| Uniformity coefficient, Cu                     | 25.20 | Well<br>graded | Soil Description:<br>Sand & Fine Soil |      |
| Curvature coefficient, Cc                      | 2.29  |                |                                       |      |

| Sample P2, Sub-Sample No.6 (Test ID: 50 - 55)  |       |                | AASHTO M145/T88                 |      |
|------------------------------------------------|-------|----------------|---------------------------------|------|
| Particles finer than 60%, D <sub>60</sub> (mm) | 0.8   | Well<br>graded | Gravel                          | 21%  |
| Particles finer than 30%, D <sub>30</sub> (mm) | 0.28  |                | Sand                            | 69%  |
| Particles finer than 10%, D <sub>10</sub> (mm) | 0.073 |                | Fine                            | <10% |
| Uniformity coefficient, Cu                     | 10.96 | Well<br>graded | Soil Description:<br>Sandy Soil |      |
| Curvature coefficient, Cc                      | 1.34  |                |                                 |      |

| Sample P2 In Summary (ID: 0 - 55)              |       |                | AASHTO M145/T88                 |        |
|------------------------------------------------|-------|----------------|---------------------------------|--------|
| Particles finer than 60%, D <sub>60</sub> (mm) | 0.8   | Well<br>graded | Gravel                          | 16.67% |
| Particles finer than 30%, D <sub>30</sub> (mm) | 0.28  |                | Sand                            | 63.17% |
| Particles finer than 10%, D <sub>10</sub> (mm) | 0.073 |                | Fine                            | 20.17% |
| Uniformity coefficient, Cu                     | 10.96 | Well<br>graded | Soil Description:<br>Sandy Soil |        |
| Curvature coefficient, Cc                      | 1.34  |                |                                 |        |

| Sample P2, Soil Ratio Summary Along the Core Depth |            |          |          |                   |
|----------------------------------------------------|------------|----------|----------|-------------------|
| Depth                                              | Gravel (%) | Sand (%) | Fine (%) | Sand + Gravel (%) |
| 10                                                 | 7%         | 43%      | 50%      | 50%               |
| 20                                                 | 18%        | 67%      | 15%      | 85%               |
| 30                                                 | 18%        | 68%      | 14%      | 86%               |
| 40                                                 | 19%        | 67%      | 14%      | 86%               |
| 50                                                 | 17%        | 65%      | 18%      | 82%               |
| 55                                                 | 21%        | 69%      | 10%      | 90%               |
| <b>Total</b>                                       | 16.5%      | 63.2%    | 20.2%    |                   |



3.4. Graph of Sieve Analysis Ratio of the Sediment Soil Types Along with the Core Depth (0 - 55) for the Sediment Sample from Location P2

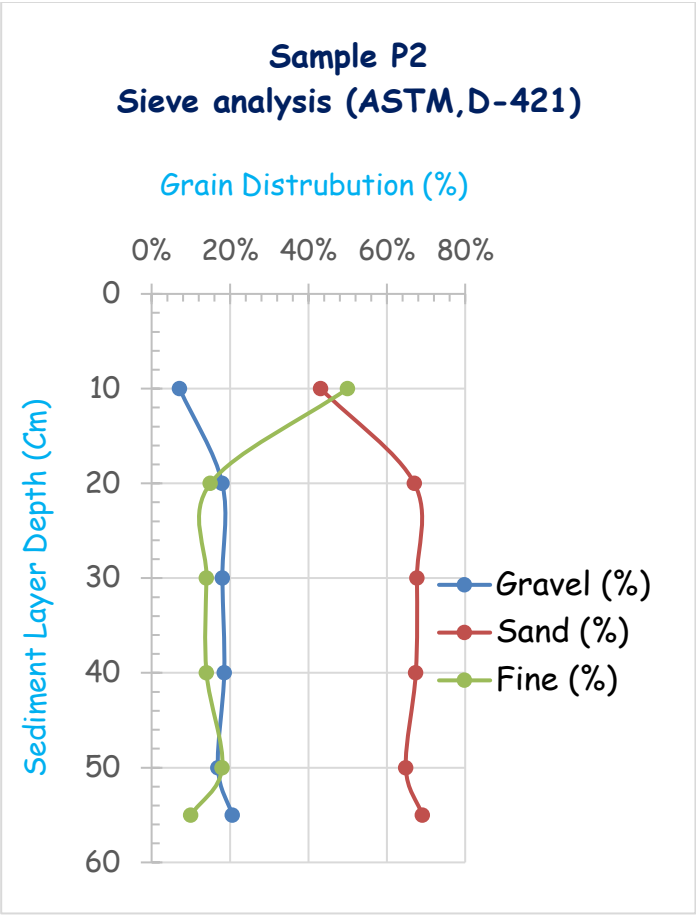

Supplement: f1 [file 8889189.f1.zip]
