# Supplementary material for: Impact of Sedimentation on Water Seepage Capacity in Lake Nakuru, Kenya
Source: Hindawi journal article supplement (doi:10.1155/2021/8889189), 2021-02-16

## SUPPLEMENTARY FILES-2

### Supplementary Files for Article Entitled: “*Impact of Sedimentation on Water Seepage Capacity in Lake Nakuru*”

#### 2.1. Weight-Volume Properties for Soil Sediment from Location P1

|                                            | LABORATORY TEST DATA SHEET                                                                        |       |       |       |       |                                      |       |       |       |       |       |       |       |       |       |       |
|--------------------------------------------|---------------------------------------------------------------------------------------------------|-------|-------|-------|-------|--------------------------------------|-------|-------|-------|-------|-------|-------|-------|-------|-------|-------|
|                                            | Weight-Volume Relationships for Soil Sediment                                                     |       |       |       |       |                                      |       |       |       |       |       |       |       |       |       |       |
|                                            | Scope: Determination of Water Content, Porosity, Void Ratio and Unity Weight of Sediment Specimen |       |       |       |       |                                      |       |       |       |       |       |       |       |       |       |       |
|                                            | Description of soil: ( <i>sediment</i> )                                                          |       |       |       |       | Sampling Location: P1                |       |       |       |       |       |       |       |       |       |       |
|                                            | Location: <i>L. Nakuru</i> (00°21'33"S, 36°05'41"E)                                               |       |       |       |       | Water Density, $\gamma_w$ (g/cm³): 1 |       |       |       |       |       |       |       |       |       |       |
|                                            | Tested by: IRADUKUNDA Parfait                                                                     |       |       |       |       | Date: 1 July 2019                    |       |       |       |       |       |       |       |       |       |       |
| Items                                      | Test Number                                                                                       |       |       |       |       |                                      |       |       |       |       |       |       |       |       |       |       |
|                                            | 1                                                                                                 | 2     | 3     | 4     | 5     | 6                                    | 7     | 8     | 9     | 10    | 11    | 12    | 13    | 14    | 15    | 16    |
| Sub-sample on the core, (cm)               | 0 - 5                                                                                             | 5-10  | 10-15 | 15-20 | 20-25 | 25-30                                | 30-35 | 35-40 | 40-45 | 45-50 | 50-55 | 55-60 | 60-65 | 65-70 | 70-75 | 75-80 |
| Specific gravity of solids, G <sub>s</sub> | 2.07                                                                                              | 1.65  | 1.62  | 1.66  | 1.92  | 2.05                                 | 2.26  | 1.81  | 1.94  | 2.01  | 2     | 1.78  | 1.71  | 1.67  | 1.63  | 1.77  |
| Length of specimen, L (cm)                 | 1.5                                                                                               | 1.5   | 1.5   | 1.2   | 1.2   | 1.2                                  | 1.5   | 1.5   | 1.5   | 1.1   | 1.2   | 1.2   | 1.1   | 0.6   | 0.6   | 0.6   |
| Dpecimen Diameter, D (cm)                  | 4.9                                                                                               | 4.9   | 4.9   | 5.1   | 5.1   | 5.1                                  | 4.9   | 4.9   | 4.9   | 5.4   | 5.1   | 5.1   | 5.4   | 5.25  | 5.25  | 5.25  |
| Volume of specimen, V (cm³)                | 28.29                                                                                             | 28.29 | 18.86 | 20.43 | 20.43 | 20.43                                | 18.86 | 18.86 | 18.86 | 22.90 | 20.43 | 20.43 | 22.90 | 21.65 | 21.65 | 21.65 |
| Mass of empty can, W <sub>1</sub> (g)      | 17.2                                                                                              | 17.12 | 17.46 | 17.02 | 17.12 | 17.28                                | 17.18 | 17.38 | 17.52 | 4.62  | 16.96 | 17.04 | 4.72  | 10.22 | 10.24 | 10.19 |
| Mass of can + wet soil, W <sub>2</sub> (g) | 46.26                                                                                             | 47.5  | 43.62 | 42.08 | 47.5  | 44.78                                | 48.86 | 49.08 | 47.92 | 31.54 | 43.42 | 41.88 | 33.78 | 26.78 | 26.94 | 27.68 |
| Mass of can + dry soil, W <sub>3</sub> (g) | 20.36                                                                                             | 22.1  | 23.74 | 24.36 | 28.3  | 25.18                                | 26.84 | 27.72 | 25.88 | 11.96 | 24.52 | 23.64 | 11.94 | 14.62 | 14.4  | 14.42 |
| Mass of water in the soil (g)              | 25.9                                                                                              | 25.4  | 19.88 | 17.72 | 19.2  | 19.6                                 | 22.02 | 21.36 | 22.04 | 19.58 | 18.9  | 18.24 | 21.84 | 12.16 | 12.54 | 13.26 |
| Mass of dry soil (g)                       | 3.16                                                                                              | 4.98  | 6.28  | 7.34  | 11.18 | 7.9                                  | 9.66  | 10.34 | 8.36  | 7.34  | 7.56  | 6.6   | 7.22  | 4.4   | 4.16  | 4.23  |
| MEASUREMENTS AND CALCULATIONS              |                                                                                                   |       |       |       |       |                                      |       |       |       |       |       |       |       |       |       |       |
| The moisture content, w (%)                | 819.6                                                                                             | 510.0 | 316.6 | 241.4 | 171.7 | 248.1                                | 228.0 | 206.6 | 263.6 | 266.8 | 250.0 | 276.4 | 302.5 | 276.4 | 301.4 | 313.5 |
| Dry density of soil, $\gamma_d$ (g/cm³)    | 0.11                                                                                              | 0.18  | 0.33  | 0.36  | 0.55  | 0.39                                 | 0.51  | 0.55  | 0.44  | 0.32  | 0.37  | 0.32  | 0.32  | 0.20  | 0.19  | 0.20  |
| Void ratio of specimen, e                  | 17.53                                                                                             | 8.37  | 3.86  | 3.62  | 2.51  | 4.30                                 | 3.41  | 2.30  | 3.38  | 5.27  | 4.40  | 4.51  | 4.42  | 7.22  | 7.48  | 8.06  |
| Bulk density of soil, $\gamma_b$ (g/cm³)   | 1.03                                                                                              | 1.07  | 1.39  | 1.23  | 1.49  | 1.35                                 | 1.68  | 1.68  | 1.61  | 1.18  | 1.30  | 1.22  | 1.27  | 0.76  | 0.77  | 0.81  |
| Porosity, n (%)                            | 94.60                                                                                             | 89.33 | 79.44 | 78.35 | 71.50 | 81.14                                | 77.33 | 69.71 | 77.15 | 84.06 | 81.50 | 81.85 | 81.56 | 87.83 | 88.21 | 88.96 |

## SUPPLEMENTARY FILES-2

### Supplementary Files for Article Entitled: “*Impact of Sedimentation on Water Seepage Capacity in Lake Nakuru*”

#### 2.2. Weight-Volume Properties for Soil Sediment from Location P2

|                                            |                                                                                                 |             |       |       |                                      |       |       |       |       |       |       |       |
|--------------------------------------------|-------------------------------------------------------------------------------------------------|-------------|-------|-------|--------------------------------------|-------|-------|-------|-------|-------|-------|-------|
|                                            | LABORATORY TEST DATA SHEET                                                                      |             |       |       |                                      |       |       |       |       |       |       |       |
|                                            | Weight-Volume Relationships for Soil Sediment                                                   |             |       |       |                                      |       |       |       |       |       |       |       |
|                                            | Scope: Determination of Water Content, Porosity, Void Ratio and Saturation of Sediment Specimen |             |       |       |                                      |       |       |       |       |       |       |       |
|                                            | Description of soil: (sediment)                                                                 |             |       |       | Sampling Location: P2                |       |       |       |       |       |       |       |
|                                            | Location: Lake Nakuru (00°20'22"S, 36°04'54"E)                                                  |             |       |       | Water Density, $\gamma_w$ (g/cm³): 1 |       |       |       |       |       |       |       |
|                                            | Tested by: IRADUKUNDA Parfait                                                                   |             |       |       | Date: 19 July 2019                   |       |       |       |       |       |       |       |
| Items                                      |                                                                                                 | Test Number |       |       |                                      |       |       |       |       |       |       |       |
|                                            |                                                                                                 | 1           | 2     | 3     | 4                                    | 5     | 6     | 7     | 8     | 9     | 10    | 11    |
| Sub-sample on the core, (cm)               |                                                                                                 | 0 - 5       | 5-10  | 10-15 | 15-20                                | 20-25 | 25-30 | 30-35 | 35-40 | 40-45 | 45-50 | 50-55 |
| Specific gravity of solids, Gs             |                                                                                                 | 2.34        | 2.25  | 2.27  | 2.17                                 | 2.2   | 2.21  | 2.19  | 2.28  | 2.09  | 2.09  | 2.39  |
| Length of specimen, L (cm)                 |                                                                                                 | 1.5         | 1.5   | 1.5   | 1.2                                  | 1.2   | 1.2   | 1.5   | 1.5   | 1.5   | 1.1   | 1.2   |
| Specimen Diameter, D (cm)                  |                                                                                                 | 4.9         | 4.9   | 4.9   | 5.1                                  | 5.1   | 5.1   | 4.9   | 4.9   | 4.9   | 5.4   | 5.1   |
| Volume of specimen, V (cm³)                |                                                                                                 | 28.29       | 28.29 | 18.86 | 20.43                                | 20.43 | 20.43 | 18.86 | 18.86 | 18.86 | 22.90 | 20.43 |
| Mass of empty can, W <sub>1</sub> (g)      |                                                                                                 | 17.65       | 17.55 | 17.92 | 17.46                                | 17.59 | 17.74 | 17.62 | 17.83 | 17.96 | 4.74  | 17.38 |
| Mass of can + wet soil, W <sub>2</sub> (g) |                                                                                                 | 57.22       | 58.15 | 54.24 | 52.29                                | 53.14 | 57.1  | 55.41 | 61.66 | 60.99 | 49.92 | 60.07 |
| Mass of can + dry soil, W <sub>3</sub> (g) |                                                                                                 | 41.37       | 47.94 | 46.84 | 45.45                                | 45.57 | 47.44 | 47.74 | 52.49 | 51.11 | 40.92 | 53.39 |
| Mass of water in the soil (g)              |                                                                                                 | 15.85       | 10.21 | 7.4   | 6.84                                 | 7.57  | 9.66  | 7.67  | 9.17  | 9.88  | 9     | 6.68  |
| Mass of dry soil (g)                       |                                                                                                 | 23.72       | 30.39 | 28.92 | 27.99                                | 27.98 | 29.7  | 30.12 | 34.66 | 33.15 | 36.18 | 36.01 |
| MEASUREMENTS AND CALCULATIONS              |                                                                                                 |             |       |       |                                      |       |       |       |       |       |       |       |
| The moisture content, w (%)                |                                                                                                 | 66.82       | 33.60 | 25.59 | 24.44                                | 27.06 | 32.53 | 25.46 | 26.46 | 29.80 | 24.88 | 18.55 |
| Dry density of soil, $\gamma_d$ (g/cm³)    |                                                                                                 | 0.84        | 1.07  | 1.53  | 1.37                                 | 1.37  | 1.45  | 1.60  | 1.84  | 1.76  | 1.58  | 1.76  |
| Void ratio of specimen, e                  |                                                                                                 | 1.79        | 1.09  | 0.48  | 0.58                                 | 0.61  | 0.52  | 0.37  | 0.24  | 0.19  | 0.32  | 0.36  |
| Bulk density of soil, $\gamma_b$ (g/cm³)   |                                                                                                 | 1.40        | 1.44  | 1.93  | 1.70                                 | 1.74  | 1.93  | 2.00  | 2.32  | 2.28  | 1.97  | 2.09  |
| Porosity, n (%)                            |                                                                                                 | 64.16       | 52.25 | 32.44 | 36.86                                | 37.74 | 34.21 | 27.07 | 19.39 | 15.89 | 24.41 | 26.24 |

## SUPPLEMENTARY FILES

Supplementary Files for Article Entitled: “*Impact of Sedimentation on Water Seepage Capacity in Lake Nakuru*”

### 2.3. Moisture Content, Porosity and Unity Weight for Sediment from Location P1&P2 Along with The Core Depth

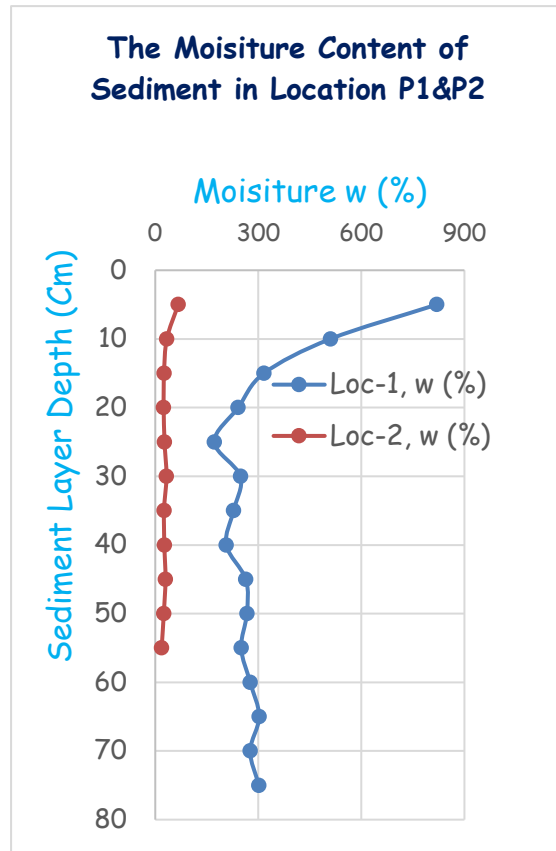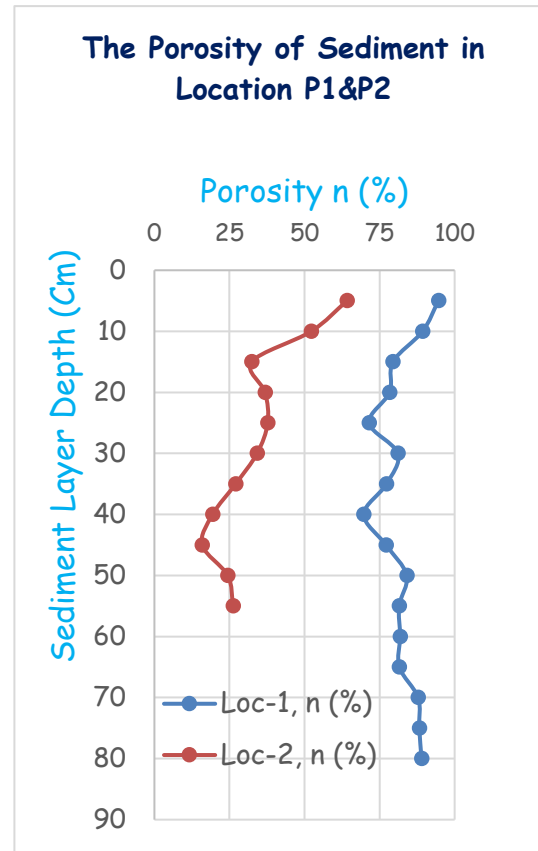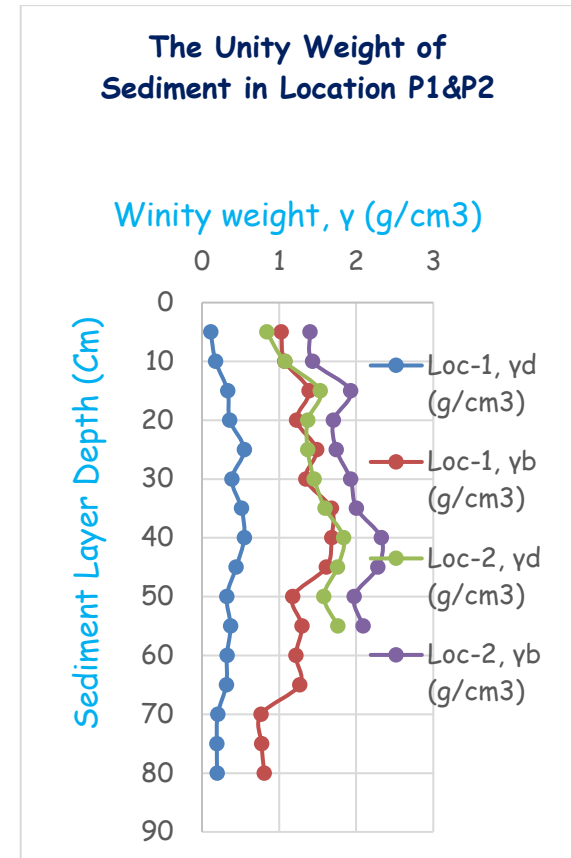

Supplement: f1 [file 8889189.f1.zip]
