# Supplementary material for: Impact of Sedimentation on Water Seepage Capacity in Lake Nakuru, Kenya
Source: Hindawi journal article supplement (doi:10.1155/2021/8889189), 2021-02-16
Supplement: f1 [file 8889189.f1.zip]

**Supplementary Files for Article Entitled: “*Impact of Sedimentation on Water Seepage Capacity in Lake Nakuru*”**

|                                                                    |                                                                          |        |        |        |        |        |                        |        |         |        |        |        |        |            |            |            |            |            |
|--------------------------------------------------------------------|--------------------------------------------------------------------------|--------|--------|--------|--------|--------|------------------------|--------|---------|--------|--------|--------|--------|------------|------------|------------|------------|------------|
|                                                                    | LABORATORY TEST DATA SHEET                                               |        |        |        |        |        |                        |        |         |        |        |        |        |            |            |            |            |            |
|                                                                    | Specific gravity of solids soil Sediment                                 |        |        |        |        |        |                        |        |         |        |        |        |        |            |            |            |            |            |
|                                                                    | Scope: Determination of Specific gravity of soil sediment specimen, (Gs) |        |        |        |        |        |                        |        |         |        |        |        |        |            |            |            |            |            |
|                                                                    | Description of soil: <i>sediment</i>                                     |        |        |        |        |        | Sampling point No.: P1 |        |         |        |        |        |        |            |            |            |            |            |
|                                                                    | Volume of Density Bottle at 20°C: 100 ml                                 |        |        |        |        |        | Temperature of test    |        | 23 (°C) |        |        |        |        |            |            |            |            |            |
|                                                                    | Location: <i>Lake Nakuru</i> (00°21'33"S, 36°05'41"E)                    |        |        |        |        |        | Correction Factor (A)  |        | 0.9993  |        |        |        |        |            |            |            |            |            |
|                                                                    | Tested by: IRADUKUNDA Parfait                                            |        |        |        |        |        | Date: 02 July 2019     |        |         |        |        |        |        |            |            |            |            |            |
| Items                                                              | Test Number                                                              |        |        |        |        |        |                        |        |         |        |        |        |        |            |            |            |            |            |
|                                                                    | 1                                                                        | 2      | 3      | 4      | 5      | 6      | 7                      | 8      | 9       | 10     | 11     | 12     | 13     | 14         | 15         | 16         | 17         | 18         |
| Subsample on the core (cm)                                         | ≈0 - 5                                                                   | 5-10   | 10-15  | 15-20  | 20-25  | 25-30  | 30-35                  | 35-40  | 40-45   | 45-50  | 50-55  | 55-60  | 60-65  | 65-70      | 70-75      | 75-80      | 80-85      | 85-90      |
| Mass of density bottle, W <sub>1</sub> (g)                         | 37.78                                                                    | 38.68  | 38.91  | 47.17  | 37.5   | 37.03  | 57.61                  | 38.39  | 36.64   | 46.53  | 36.78  | 39.86  | 39.07  | 47.27      | 37.89      | 37.1<br>5  | 57.7<br>4  | 38.5       |
| Mass of density bottle + soil, W <sub>2</sub> (g)                  | 56.75                                                                    | 61.66  | 65.96  | 70.73  | 57.58  | 52.89  | 74.17                  | 57.86  | 56.1    | 62.83  | 53.92  | 57.93  | 58.22  | 67.57      | 56.11      | 55.5<br>2  | 73.1<br>1  | 54.8<br>7  |
| Mass of bottle +soil+ water, W <sub>3</sub> (g)                    | 151.92                                                                   | 154.84 | 156.79 | 158.97 | 157    | 148.48 | 162.49                 | 152.2  | 149.04  | 156.49 | 150.11 | 154.36 | 154.36 | 157.7<br>8 | 154.4<br>8 | 148.<br>45 | 161.<br>41 | 150.<br>41 |
| Mass of bottle + water filled, W <sub>4</sub> (g)                  | 142.11                                                                   | 145.78 | 146.41 | 149.58 | 147.37 | 140.37 | 153.27                 | 143.49 | 139.62  | 148.3  | 141.56 | 146.44 | 146.42 | 149.6<br>1 | 147.4<br>3 | 140.<br>43 | 155.<br>29 | 143.<br>62 |
| Mass of equal volume of water, W <sub>w</sub> (g)                  | 9.16                                                                     | 13.92  | 16.67  | 14.17  | 10.45  | 7.75   | 7.34                   | 10.76  | 10.04   | 8.11   | 8.59   | 10.15  | 11.21  | 12.13      | 11.17      | 10.3<br>5  | 9.25       | 9.58       |
| MEASUREMENTS AND CALCULATIONS                                      |                                                                          |        |        |        |        |        |                        |        |         |        |        |        |        |            |            |            |            |            |
| G <sub>s</sub> (T <sub>1</sub> °c) =W <sub>s</sub> /W <sub>w</sub> | 2.07                                                                     | 1.65   | 1.62   | 1.66   | 1.92   | 2.05   | 2.26                   | 1.81   | 1.94    | 2.01   | 2.00   | 1.78   | 1.71   | 1.67       | 1.63       | 1.77       | 1.66       | 1.71       |
| G <sub>s</sub> (20°c) =G <sub>s</sub> (T <sub>1</sub> °c)*A        | 2.07                                                                     | 1.65   | 1.62   | 1.66   | 1.92   | 2.05   | 2.25                   | 1.81   | 1.94    | 2.01   | 1.99   | 1.78   | 1.71   | 1.67       | 1.63       | 1.77       | 1.66       | 1.71       |
| Notes and observations: Kinda Lighty / Sediment                    |                                                                          |        |        |        |        |        |                        |        |         |        |        |        |        |            |            |            |            |            |

**Supplementary Files for Article Entitled: “*Impact of Sedimentation on Water Seepage Capacity in Lake Nakuru*”**

|                                                                                                                     |                                                                                 |        |        |        |                              |        |        |        |        |        |        |  |
|---------------------------------------------------------------------------------------------------------------------|---------------------------------------------------------------------------------|--------|--------|--------|------------------------------|--------|--------|--------|--------|--------|--------|--|
|                                                                                                                     | <b>LABORATORY TEST DATA SHEET</b>                                               |        |        |        |                              |        |        |        |        |        |        |  |
|                                                                                                                     | <b>Specific gravity of soil Sediment solids</b>                                 |        |        |        |                              |        |        |        |        |        |        |  |
|                                                                                                                     | <b>Scope:</b> Determination of Specific gravity of soil sediment specimen, (Gs) |        |        |        |                              |        |        |        |        |        |        |  |
|                                                                                                                     | <b>Description of soil:</b> <i>sediment</i>                                     |        |        |        | <b>Sampling Point No.:</b> 2 |        |        |        |        |        |        |  |
|                                                                                                                     | <b>Volume of Density Bottle at 20°C:</b> 100 ml                                 |        |        |        | Temperature of test          |        | 22 °C  |        |        |        |        |  |
|                                                                                                                     | <b>Location:</b> <i>Lake Nakuru</i> (00°20'22"S, 36°04'54"E)                    |        |        |        | Correction Factor (A)        |        | 0.9996 |        |        |        |        |  |
|                                                                                                                     | <b>Tested by:</b> IRADUKUNDA Parfait                                            |        |        |        | <b>Date:</b> 02 Aug 2019     |        |        |        |        |        |        |  |
| <b>Items</b>                                                                                                        | <b>Test Number</b>                                                              |        |        |        |                              |        |        |        |        |        |        |  |
|                                                                                                                     | 1                                                                               | 2      | 3      | 4      | 5                            | 6      | 7      | 8      | 9      | 10     | 11     |  |
| Subsample on the core (cm)                                                                                          | ≈0 - 5                                                                          | 5-10   | 10-15  | 15-20  | 20-25                        | 25-30  | 30-35  | 35-40  | 40-45  | 45-50  | 50-55  |  |
| Mass of density bottle, W <sub>1</sub> (g)                                                                          | 36.78                                                                           | 39.91  | 39.02  | 47.29  | 37.62                        | 37.1   | 57.73  | 38.49  | 36.73  | 46.62  | 47.13  |  |
| Mass of density bottle + soil, W <sub>2</sub> (g)                                                                   | 57.34                                                                           | 67.44  | 64.9   | 72.51  | 62.9                         | 64.1   | 85.18  | 69.88  | 67.09  | 79.74  | 80.08  |  |
| Mass of bottle +soil+ water, W <sub>3</sub> (g)                                                                     | 153.37                                                                          | 161.72 | 160.91 | 163.25 | 161.25                       | 155.26 | 170.24 | 161.2  | 155.5  | 165.65 | 167.62 |  |
| Mass of bottle + water filled, W <sub>4</sub> (g)                                                                   | 141.58                                                                          | 146.45 | 146.44 | 149.63 | 147.47                       | 140.45 | 155.33 | 143.57 | 139.67 | 148.36 | 148.44 |  |
| Mass of equal volume of water, Ww (g) = (W <sub>4</sub> - W <sub>1</sub> ) - (W <sub>3</sub> - W <sub>2</sub> ) (g) | 8.77                                                                            | 12.26  | 11.41  | 11.6   | 11.5                         | 12.19  | 12.54  | 13.76  | 14.53  | 15.83  | 13.77  |  |
| <b>MEASUREMENTS AND CALCULATIONS</b>                                                                                |                                                                                 |        |        |        |                              |        |        |        |        |        |        |  |
| Gs(T <sub>1</sub> °c) =Ws/Ww                                                                                        | 2.34                                                                            | 2.25   | 2.27   | 2.17   | 2.20                         | 2.21   | 2.19   | 2.28   | 2.09   | 2.09   | 2.39   |  |
| Gs(20°c) =Gs(T <sub>1</sub> °c) *A                                                                                  | 2.34                                                                            | 2.24   | 2.27   | 2.17   | 2.20                         | 2.21   | 2.19   | 2.28   | 2.09   | 2.09   | 2.39   |  |
| <b>Notes and observations:</b> not weighty / Sediment                                                               |                                                                                 |        |        |        |                              |        |        |        |        |        |        |  |
