# Supplementary material for: Impact of Sedimentation on Water Seepage Capacity in Lake Nakuru, Kenya
Source: Hindawi journal article supplement (doi:10.1155/2021/8889189), 2021-02-16
Supplement: f1 [file 8889189.f1.zip]

Archive with 5 entries (5 files):
- 8889189.f1/Hydraulic_Conductivity_P1&P2_(Supplementary_File5).pdf
- 8889189.f1/Hydrometer_Analysis_P1_(Supplementary_File4).pdf
- 8889189.f1/Sieve_Analysis_P2_(Supplementary_File3).pdf
- 8889189.f1/Specific_Gravity_P1&P2_(Supplementary_File1).pdf
- 8889189.f1/Weight_Volume_Properties_P1&P2_(Supplementary_File2).pdf
