# Supplementary material for: Impact of Sedimentation on Water Seepage Capacity in Lake Nakuru, Kenya
Source: Hindawi journal article supplement (doi:10.1155/2021/8889189), 2021-02-16

**Supplementary Files for Article Entitled: “*Impact of Sedimentation on Water Seepage Capacity in Lake Nakuru*”**

[illegible]

**Supplementary Files for Article entitled: “*Impact of Sedimentation on Water Seepage Capacity in Lake Nakuru*”**

[illegible]

## SUPPLEMENTARY FILES-5

Supplementary Files for Article Entitled: “*Impact of Sedimentation on Water Seepage Capacity in Lake Nakuru*”

### 5.3. Hydraulic Conductivity of the Soil Sediment from Location P1&P2 Along with the Core Depth

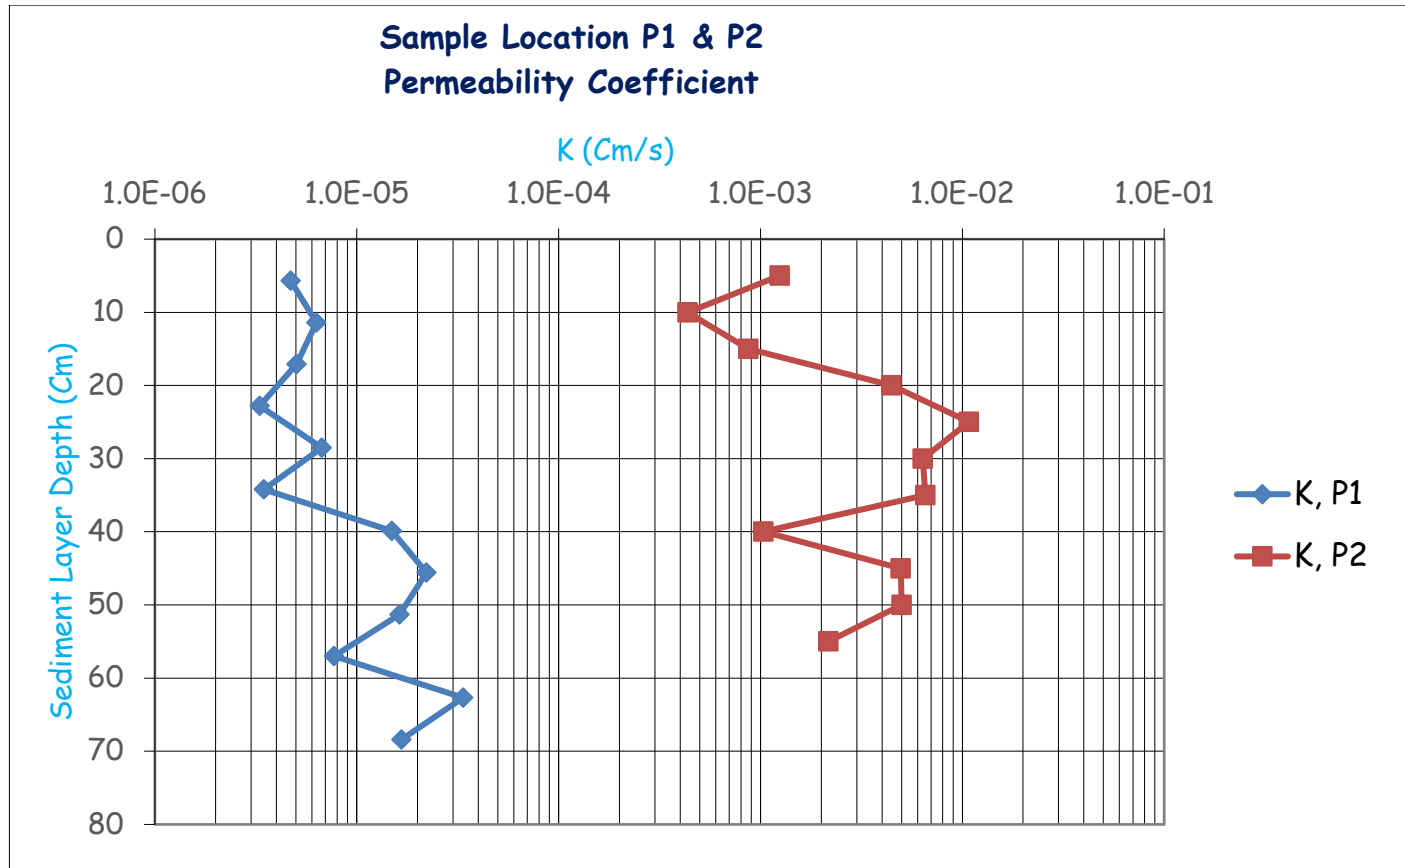

Supplement: f1 [file 8889189.f1.zip › 8889189.f1/Hydraulic_Conductivity_P1&P2_(Supplementary_File5).pdf]
